# Supplementary material
Source: ML conference proceedings conference paper supplement (https://proceedings.neurips.cc/paper_files/paper/2022/hash/0dc91de822b71c66a7f54fa121d8cbb9-Abstract.html)
Supplement: Supplementary file 1 [file 0dc91de822b71c66a7f54fa121d8cbb9-Supplemental-Datasets_and_Benchmarks.pdf]

---

# GOOD: A Graph Out-of-Distribution Benchmark

## Supplementary Material

---

Shurui Gui\*, Xiner Li\*, Limei Wang, Shuiwang Ji  
Texas A&M University  
College Station, TX 77843  
{shurui.gui,lxe,limei,sji}@tamu.edu

### A GOOD Dataset Details

GOOD provides 11 datasets with 17 domain selections. For each domain selection, we provide two shift splits and a no shift split, leading to 51 splits. For each covariate/concept shift split, we split data into 5 subsets, namely, training set, in-distribution (ID) validation set, in-distribution (ID) test set, out-of-distribution (OOD) validation set, and out-of-distribution (OOD) test set. For no shift splits, we split data into training, ID validation, and ID test sets. The statistics of splits are listed in Table 1. Meanwhile, the datasets in GOOD consist of 8 real-world datasets, 1 semi-artificial dataset, and 2 synthetic datasets, and we specify the details of splits for each category in the following three paragraphs. The 8 real-world datasets are public datasets [5, 8, 4, 1] and we closely follow the license rules, which are specified in the Appendix F.

**Real-world datasets.** For covariate shift splits, given a domain selection, we sort the graphs/nodes by their domains and divide the data into a certain number of domains by specifying the split ratio. Then training, validation, and test sets consist of one or several domains. Also the independence between  $Y$  and  $X_{\text{ind}}$  guarantees that covariate shift design does not contain concept shift theoretically. For concept shift splits, we adopt a screening process to build the splits. We first explain this screening process for graph prediction datasets. Each concept has specific domain-label correlations, which come in the form of a set of domain-label probabilities. Consequently, to build a specific concept, each graph has a domain-label probability to be included in this concept. Therefore, we build each concept by scanning the whole dataset and selecting graphs to be included according to their probabilities. The selected graphs form the current concept and are excluded from the dataset scanning. We repeat this procedure to form each of the concepts sequentially, and the last concept includes all the remaining graphs. Similarly, in node classification tasks, we apply the screening process to nodes instead of graphs. That is, we build node selection masks instead of collecting graphs out of datasets. Note that the selection probabilities are relatively similar for those concepts within the training set, while largely dissimilar between the training, validation, and test sets. Also, it is difficult to specify all domain-label probabilities for tasks like 70-classes classification in GOOD-Cora, and impossible for regression tasks. Therefore, we design to group labels as only two categories, namely high/low labels. Then we can build concept splits in a clear sense. For example, we assign a high probability for domain  $d_i$  with label 0 in training concepts, while a high probability for domain  $d_i$  with label 1 in test concepts.

**Semi-artificial datasets.** For semi-artificial datasets, we firstly define a domain/concept and modify graph attributes according to the assigned domain/concept. Due to the difficulty in modifying graph structures without breaking the semantics of the original graphs, we choose to modify or append the features of nodes in graphs. GOOD currently corporate one semi-artificial dataset GOOD-CMNIST.

---

\*Equal contributions

Table 1: Numbers of graphs/nodes in training, ID validation, ID test, OOD validation, and OOD test sets for the 11 datasets.

| Dataset     | Shift     | Train      | ID validation | ID test | OOD validation | OOD test | Train  | OOD validation | ID validation | ID test | OOD test |
|-------------|-----------|------------|---------------|---------|----------------|----------|--------|----------------|---------------|---------|----------|
| GOOD-HIV    |           | Scaffold   |               |         |                |          | Size   |                |               |         |          |
|             | covariate | 24682      | 4112          | 4112    | 4113           | 4108     | 26169  | 4112           | 4112          | 2773    | 3961     |
|             | concept   | 15209      | 3258          | 3258    | 9365           | 10037    | 14454  | 3096           | 3096          | 9956    | 10525    |
| GOOD-PCBA   |           | Scaffold   |               |         |                |          | Size   |                |               |         |          |
|             | covariate | 262764     | 43792         | 43792   | 44019          | 43562    | 269990 | 43792          | 43792         | 48430   | 31925    |
|             | concept   | 159158     | 34105         | 34105   | 90740          | 119821   | 150121 | 32168          | 32168         | 108267  | 115205   |
| GOOD-ZINC   |           | Scaffold   |               |         |                |          | Size   |                |               |         |          |
|             | covariate | 149674     | 24945         | 24945   | 24945          | 24946    | 161893 | 24945          | 24945         | 20270   | 17402    |
|             | concept   | 101867     | 21828         | 21828   | 43539          | 60393    | 89418  | 19161          | 19161         | 51409   | 70306    |
| GOOD-SST2   |           | Length     |               |         |                |          | Size   |                |               |         |          |
|             | covariate | 24744      | 5301          | 5301    | 17206          | 17490    |        |                |               |         |          |
|             | concept   | 27270      | 5843          | 5843    | 15142          | 15944    |        |                |               |         |          |
| GOOD-CMNIST |           | Color      |               |         |                |          | Size   |                |               |         |          |
|             | covariate | 42000      | 7000          | 7000    | 7000           | 7000     |        |                |               |         |          |
|             | concept   | 29400      | 6300          | 6300    | 14000          | 14000    |        |                |               |         |          |
| GOOD-Motif  |           | Base       |               |         |                |          | Size   |                |               |         |          |
|             | covariate | 18000      | 3000          | 3000    | 3000           | 3000     | 18000  | 3000           | 3000          | 3000    | 3000     |
|             | concept   | 12600      | 2700          | 2700    | 6000           | 6000     | 12600  | 2700           | 2700          | 6000    | 6000     |
| GOOD-Cora   |           | Word       |               |         |                |          | Degree |                |               |         |          |
|             | covariate | 9378       | 1979          | 1979    | 3003           | 3454     | 8213   | 1979           | 1979          | 3841    | 3781     |
|             | concept   | 7273       | 1558          | 1558    | 3807           | 5597     | 7281   | 1560           | 1560          | 3706    | 5686     |
| GOOD-Arxiv  |           | Time       |               |         |                |          | Degree |                |               |         |          |
|             | covariate | 57073      | 16934         | 16934   | 29799          | 48603    | 68607  | 16934          | 16934         | 46264   | 20604    |
|             | concept   | 62083      | 13303         | 13303   | 32560          | 48094    | 58619  | 12561          | 12561         | 34222   | 51380    |
| GOOD-Twitch |           | Language   |               |         |                |          | Size   |                |               |         |          |
|             | covariate | 14448      | 3412          | 3412    | 6551           | 6297     |        |                |               |         |          |
|             | concept   | 13605      | 2914          | 2914    | 6762           | 7925     |        |                |               |         |          |
| GOOD-WebKB  |           | University |               |         |                |          | Size   |                |               |         |          |
|             | covariate | 244        | 61            | 61      | 125            | 126      |        |                |               |         |          |
|             | concept   | 282        | 60            | 60      | 106            | 109      |        |                |               |         |          |
| GOOD-CBAS   |           | Color      |               |         |                |          | Size   |                |               |         |          |
|             | covariate | 420        | 70            | 70      | 70             | 70       |        |                |               |         |          |
|             | concept   | 140        | 140           | 140     | 140            | 140      |        |                |               |         |          |
| GOOD-CBAS   |           | Color      |               |         |                |          | Size   |                |               |         |          |
|             | covariate | 420        | 70            | 70      | 70             | 70       |        |                |               |         |          |
|             | concept   | 140        | 140           | 140     | 140            | 140      |        |                |               |         |          |

For GOOD-CMNIST, since the original colors of graphs are in gray-scale, we color graphs by setting node features as 3-channel RGB colors such as red, blue, and cyan. For covariate shift, the training graphs contain 5 color domains, thus forming 5 environments. Other than these 5 colors, the validation and test set graphs are in different colors, respectively. Therefore, in total, we produce 7 different node color features. For concept shift, each digit label is associated with one color, *e.g.*, 0 with red, 1 with green, 2 with blue, etc. Hence we generate 10 different node color features to match the 10-class labels.

**Synthetic datasets.** For GOOD-Motif, we generate graphs using five label-independent base graphs (wheel, tree, ladder, star, and path) and three label-dependent motifs (house, cycle, and crane). We select the base graph type and the size as domain features to create covariate and concept splits. In the covariate shift splits with base domain, the training set includes graphs with the first three bases, while the validation and the test sets include graphs with base star and path, respectively. In the concept splits with base domain, for 3 different concepts in the training set, each motif is highly correlated to a specific base graph with different correlation rates; *i.e.*, the house-wheel, cycle-tree, and crane-ladder correlations in the training concepts have high probabilities of 99%, 97%, and 95%. In contrast, in the validation and the test sets, these correlations are weak and nonexistent, respectively. Note that only three base graphs are used in this concept shift. In both shift splits with size domain, the base graphs match motifs randomly, while the sizes of base graphs differ. Given five size ranges, in covariate splits, the training set contains three small sizes, while the validation and the test sets include the middle and the largest size ranges, respectively. In concept splits, there are three size ranges which have high, weak, and no correlations with labels for the training, validation,

Table 2: General model and hyperparameters for 11 datasets. Specifically, GOOD-SST2 uses 100 max epochs for DIR and 200 for the rest of the methods; GOOD-Twitch and GOOD-WebKB uses an initial learning rate of 5e-3 for EERM and 1e-3 for the rest of the methods.

| Dataset     | model       | # model layers | batch size | # max epochs | # iterations per epoch | initial learning rate |
|-------------|-------------|----------------|------------|--------------|------------------------|-----------------------|
| GOOD-HIV    | GIN-Virtual | 3              | 32         | 200          | –                      | 1e-3                  |
| GOOD-PCBA   | GIN-Virtual | 5              | 32         | 200          | –                      | 1e-3                  |
| GOOD-ZINC   | GIN-Virtual | 3              | 32         | 200          | –                      | 1e-3                  |
| GOOD-SST2   | GIN-Virtual | 3              | 32         | 200/100      | –                      | 1e-3                  |
| GOOD-CMNIST | GIN-Virtual | 5              | 128        | 500          | –                      | 1e-3                  |
| GOOD-Motif  | GIN         | 3              | 32         | 200          | –                      | 1e-3                  |
| GOOD-Cora   | GCN         | 3              | 4096       | 100          | 10                     | 1e-3                  |
| GOOD-Arxiv  | GCN         | 3              | 4096       | 100          | 100                    | 1e-3                  |
| GOOD-Twitch | GCN         | 3              | 4096       | 100          | 10                     | 1e-3/5e-3             |
| GOOD-WebKB  | GCN         | 3              | 4096       | 100          | 10                     | 1e-3/5e-3             |
| GOOD-CBAS   | GCN         | 3              | 1000       | 200          | 10                     | 3e-3                  |

and test sets, respectively. GOOD-CBAS is a color domain dataset with a similar color strategy as GOOD-CMNIST. The main difference in the coloring process is that GOOD-CBAS adopts 4-channel RGBA colors instead of 3-channel colors.

More details about split algorithms can be found in [https://github.com/divelab/GOOD/tree/main/GOOD/data/good\\_datasets](https://github.com/divelab/GOOD/tree/main/GOOD/data/good_datasets).

**Discussions of the environment variable in the causal graph.** In covariate shift, the environment variable  $E$  is only associated with  $X_{\text{ind}}$ . According to the split processes in Section 3,  $E \rightarrow X_{\text{ind}}$  in synthetic/semi-artificial datasets, while  $E \leftarrow X_{\text{ind}}$  in real-world datasets, where  $\rightarrow$  denotes a causal mapping. In concept shift,  $E$  is correlated with both  $X_{\text{ind}}$  and  $Y$ . In synthetic datasets,  $E$  is a confounder, *i.e.*,  $Y \leftarrow E \rightarrow X_{\text{ind}}$ . In semi-artificial datasets,  $Y \rightarrow E \rightarrow X_{\text{ind}}$ . In real-world datasets,  $Y \rightarrow E \leftarrow X_{\text{ind}}$ .

## B Experimental Details

We conduct experiments on 11 datasets, 51 shift splits, with 10 baseline methods. For graph prediction and node prediction tasks, we respectively select strong and commonly acknowledged GNN backbones. For each dataset, we use the same GNN backbone for all baseline methods for fair comparison. For graph prediction tasks, we use GIN-Virtual Node [9, 3] as the GNN backbone. As an exception, for GOOD-Motif we adopt GIN [9] as the GNN backbone, since we observe from experiments that the global information provided by virtual nodes would interrupt the training process here. For node prediction tasks, we adopt GraphSAINT [10] and use GCN [6] as the GNN backbone. Note that the GNN backbone for Mixup is a modified GCN according to the implementation of Wang et al. [7].

Our code is implemented based on PyTorch Geometric [2]. For all the experiments, we use the Adam optimizer, with a weight decay of 0 and a dropout rate of 0.5. The GNN model and the number of convolutional layers for each dataset are specified in Table 2. We use mean global pooling and the RELU activation function, and the dimension of the hidden layer is 300. The batch size, the maximum number of epochs, (the number of iterations per epoch for node prediction tasks,) and initial learning rate are also specified in Table 2. In the training process, all models are trained to converge. For computation, we generally use one NVIDIA GeForce RTX 2080 Ti for each single experiment. However, the graph OOD algorithm EERM encounters CUDA out of memory, due to its high memory requirement.

**Hyperparameters for OOD algorithms.** For each OOD algorithm, we choose one or two algorithm-specific hyperparameter to tune. For IRM and Deep Coral, we tune the weight for penalty loss. For VREx, we tune the weight for VREx’s loss variance penalty. For GroupDRO, we tune the step size. For DANN, we tune the weight for domain classification penalty loss. For Mixup, we tune the alpha value of its Beta function. The Beta function is used to randomize the lamda weight, which is the weight for mixing two instances up. For DIR, we tune the causal ratio for selecting causal edges. For EERM, we tune the learning rate for reinforcement learning and the beta value to trade off between mean and variance. For SRGNN, we tune the weight for shift-robust loss calculated by central moment discrepancy. For each split of a dataset and each OOD algorithm, we search from a

hyperparameter set of 3 to 8 values and select the optimal one based on validation metric scores. The hyperparameter sets and the optimal hyperparameters are listed in Appendix E.

**Reproducibility.** For all experiments, we select the best checkpoints for ID and OOD tests according to ID and OOD validation sets, and report the results. All the datasets, codes, and best checkpoints to reproduce the results in this paper are available at <https://github.com/divelab/GOOD/>. Simple usage guideline and examples are as Appendix F. For coding details and instructions, please refer to the GOOD package documents <https://good.readthedocs.io>.

## C Empirical Results and Analysis

We analyze empirical results based on the numerical results in Appendix D. Notations are the same as in the main paper. By comparing  $ID_{ID}$  with  $OOD_{ID}$ , and  $ID_{OOD}$  with  $OOD_{OOD}$  results, we can observe substantial and consistent gaps between both pairs of ID/OOD performances. In all cases, the OOD performance is significantly worse than the corresponding ID performance, demonstrating that all our splits meaningfully produce distribution shifts. For most splits, the  $OOD_{ID}$  performance is worse than the  $OOD_{OOD}$  performance. This implies that OOD validation sets outperform ID validation sets in selecting models with better generalization ability, since the OOD validation set contains similar distribution shifts as the OOD test set. However, this is not always the case, since models do not possess sufficient generalization ability, and cannot always deal with distribution shifts during test even these shifts are similar to that during validation. In addition, for the no shift random split, where only ID setting exists, performances are comparable with covariate/concept  $ID_{ID}$  settings but constantly a bit worse; this is explainable in the sense that no shift splits include more unfiltered OOD data, and the greater diversity of data adds to training difficulty.

In most cases, algorithms have comparable performances on the same split. Many OOD algorithms outperform ERM with certain patterns, and the number of outperforming cases reveals essential information about the generalization ability of an algorithm. As mentioned in Section 5.2 of the main paper, the risk interpolation (GroupDRO) and extrapolation (VREx) perform favorably against other methods on multiple datasets and shift splits. VREx outperforms other methods on 7 out of 34 OOD splits, evidencing its learning invariance and robustness, especially for covariate shifts in graph prediction tasks. GroupDRO outperforms on 8 out of 34 OOD splits, showing its advantage in fair optimization. The two feature discrepancy minimization methods, DANN and Deep Coral, do not perform well enough. DANN outperforms on 4 splits, and it is especially suitable for graph concept shift splits. Deep Coral outperforms on 1 OOD split but usually has advantages on ID tests. Finally, IRM performs similarly to ERM and outperforms on 3 of the OOD results, showing the difficulty of achieving invariant prediction in non-linear settings.

Graph OOD methods make extra effort to interpolate the irregularity and connectivity of graph topology, and certain improvements are achieved. Mixup-For-Graph exclusively excels at node prediction tasks, yielding consistent gains across datasets, which can attribute to its node-specific design [7]. It outperforms 6 out of 14 node-task OOD splits. However, it fails at graph prediction tasks due to the simple graph representation mixup strategy. DIR specifically solves concept shifts for graph classification tasks and outperforms on 3 splits, indicating that interventional augmentation on representations weakens spurious correlations by diversifying the distribution. Its benefit on concept shift does not apply to covariate shifts since DIR only expands the combination of representations without creating new domains; it also fails on regression tasks which require a more delicate learning process. EERM and SRGNN generally have average performances, outperforming only on a few splits. EERM reveals that while environment generation is learnable with REINFORCE, this adversarial training is difficult and needs to be perfected. SRGNN makes use of our OOD validation data to draw the training data closer to an OOD distribution; however, without sufficient generalization, it can seldom perform well in tests since OOD validation data cannot exactly reflect OOD test data. To conclude, while these graph-specific methods apply well to graph topology, other flaws in the methodology design create a performance bottleneck.

When OOD algorithms achieve good performance on certain splits, they usually cannot perform equally well in the corresponding ID settings. This phenomenon reveals the OOD-specific generalization ability of these algorithms. In contrast, Mixup, the data augmentation method, performs equally well in both OOD and ID settings. This indicates its data augmentation nature that benefits the model's

generalization ability by making overall progress in learning. Also, the deviation minimization of feature covariant matrices benefits Deep Coral’s performances in ID settings.

**Insights on future OOD method development.** Our results and comparisons show that current OOD algorithms can improve generalization abilities, but not significantly, underscoring the need for OOD methods that are more robust and better-performing in practice. Additionally, in practice models cannot be expected to solve unknown distribution shifts. Thus, we believe using the given environment information in training to convey the types of shifts expected during testing is a promising direction. Similarly, we suggest using OOD validation containing possible distribution shift types of OOD test set to select models that are potentially better at our target generalization abilities. Moreover, we observe distinct performance difference on covariate and concept shifts for OOD algorithms, demonstrating that OOD algorithms might need shift-specific design to maximize generalization ability for one type of shift. In this case, future OOD methods can focus on solving one of covariate or concept shift. Inspired by a recent work [12], we expect to evaluate covariate and concept shifts using shift-specific metrics. Therefore, covariate and concept shifts can be viewed, solved and evaluated separately. On top of that, OOD generalization abilities can be improved by managing well-designed model architectures, optimization schemes, or data augmentation strategies. To solve graph OOD problems, it is critical that methods should be specifically designed for graphs. For example, Mixup’s specifically designed node prediction network [7] is quite well-performing while the graph prediction network [7] adopted directly from image field [11] shows no advantage. One possible reason is that functional data augmentation for graphs should consider the complex structure of graphs, so simple strategies like direct graph representation Mixup can cause topological mismatch.

## D Complete Dataset Results

### D.1 Complete numerical results

We report the complete results of ID/OOD test performances from ID/OOD validation for 10 baselines on 11 datasets in a series of tables, as shown in Table 3-19.

Table 3: ID/OOD test performances from ID/OOD validation on GOOD-HIV with scaffold domain. Numerical results are average  $\pm$  standard deviation across 10 random runs. Numbers in **bold** represent the best results. The metric and domain selections for each dataset are listed in each table. Note that the no shift random split only has the ID setting.

| GOOD-HIV   | scaffold                |                         |                         |                         |                         |                         |                         |                         |                         |               |
|------------|-------------------------|-------------------------|-------------------------|-------------------------|-------------------------|-------------------------|-------------------------|-------------------------|-------------------------|---------------|
|            | covariate               |                         |                         |                         |                         | concept                 |                         |                         |                         | no shift      |
|            | ID validation           |                         | OOD validation          |                         |                         | ID validation           |                         | OOD validation          |                         | ID validation |
|            | ID test                 | OOD test                | ID test                 | OOD test                |                         | ID test                 | OOD test                | ID test                 | OOD test                | ID test       |
| ERM        | <b>82.79</b> $\pm$ 1.10 | 68.86 $\pm$ 2.10        | 80.84 $\pm$ 0.57        | 69.58 $\pm$ 1.99        | 84.22 $\pm$ 0.85        | 65.31 $\pm$ 3.49        | 82.64 $\pm$ 1.58        | 72.33 $\pm$ 1.04        | 80.86 $\pm$ 0.63        |               |
| IRM        | 81.35 $\pm$ 0.83        | 67.31 $\pm$ 1.94        | 80.74 $\pm$ 0.87        | 67.97 $\pm$ 2.46        | 82.89 $\pm$ 1.27        | 66.06 $\pm$ 3.06        | 81.93 $\pm$ 1.11        | 72.59 $\pm$ 0.45        | <b>81.06</b> $\pm$ 0.61 |               |
| VREx       | 82.11 $\pm$ 1.48        | 69.25 $\pm$ 1.84        | 81.09 $\pm$ 1.56        | <b>70.77</b> $\pm$ 1.35 | 83.84 $\pm$ 1.09        | 66.48 $\pm$ 2.16        | 82.55 $\pm$ 1.09        | 72.60 $\pm$ 0.82        | 80.57 $\pm$ 0.65        |               |
| GroupDRO   | 82.60 $\pm$ 1.25        | 69.24 $\pm$ 2.20        | 81.60 $\pm$ 1.40        | 70.64 $\pm$ 1.72        | 83.40 $\pm$ 0.67        | 65.89 $\pm$ 2.78        | 82.01 $\pm$ 1.28        | <b>73.64</b> $\pm$ 0.86 | 80.27 $\pm$ 0.90        |               |
| DANN       | 81.18 $\pm$ 1.37        | 70.05 $\pm$ 1.02        | 80.85 $\pm$ 1.42        | 70.63 $\pm$ 1.82        | 83.87 $\pm$ 0.99        | <b>66.57</b> $\pm$ 2.30 | 82.58 $\pm$ 1.14        | 71.92 $\pm$ 1.23        | 80.82 $\pm$ 0.64        |               |
| Deep Coral | 82.53 $\pm$ 1.01        | 68.00 $\pm$ 2.62        | <b>82.02</b> $\pm$ 0.69 | 68.61 $\pm$ 1.70        | <b>84.65</b> $\pm$ 1.73 | 65.74 $\pm$ 3.49        | <b>82.99</b> $\pm$ 2.09 | 72.97 $\pm$ 1.04        | 80.73 $\pm$ 0.83        |               |
| Mixup      | 82.29 $\pm$ 1.34        | <b>70.66</b> $\pm$ 3.56 | 81.27 $\pm$ 1.83        | 68.88 $\pm$ 2.40        | 82.36 $\pm$ 1.94        | 65.94 $\pm$ 2.96        | 80.81 $\pm$ 2.26        | 72.03 $\pm$ 0.53        | 80.28 $\pm$ 1.27        |               |
| DIR        | 82.54 $\pm$ 0.17        | 66.71 $\pm$ 2.38        | 76.75 $\pm$ 1.52        | 67.47 $\pm$ 2.61        | 83.28 $\pm$ 0.48        | 65.13 $\pm$ 2.46        | 81.71 $\pm$ 1.30        | 69.05 $\pm$ 0.92        | 79.40 $\pm$ 0.60        |               |

Table 4: Performance on GOOD-HIV with size domain.

| GOOD-HIV   | size                    |                         |                         |                         |                         |                         |                         |                         |                         |               |
|------------|-------------------------|-------------------------|-------------------------|-------------------------|-------------------------|-------------------------|-------------------------|-------------------------|-------------------------|---------------|
|            | covariate               |                         |                         |                         |                         | concept                 |                         |                         |                         | no shift      |
|            | ID validation           |                         | OOD validation          |                         |                         | ID validation           |                         | OOD validation          |                         | ID validation |
|            | ID test                 | OOD test                | ID test                 | OOD test                |                         | ID test                 | OOD test                | ID test                 | OOD test                | ID test       |
| ERM        | 83.72 $\pm$ 1.06        | 58.41 $\pm$ 2.53        | 82.94 $\pm$ 1.65        | 59.94 $\pm$ 2.86        | 88.05 $\pm$ 0.67        | 44.75 $\pm$ 2.92        | 82.97 $\pm$ 2.73        | 63.26 $\pm$ 2.47        | 80.86 $\pm$ 0.63        |               |
| IRM        | 81.33 $\pm$ 1.13        | 58.41 $\pm$ 1.79        | 79.93 $\pm$ 1.00        | 59.00 $\pm$ 2.74        | <b>88.62</b> $\pm$ 0.86 | 44.17 $\pm$ 4.58        | <b>85.67</b> $\pm$ 1.20 | 59.90 $\pm$ 3.15        | <b>81.06</b> $\pm$ 0.61 |               |
| VREx       | 83.47 $\pm$ 1.11        | <b>60.24</b> $\pm$ 2.54 | 83.20 $\pm$ 1.35        | 58.53 $\pm$ 2.22        | 88.28 $\pm$ 0.88        | 44.43 $\pm$ 3.77        | 84.93 $\pm$ 1.32        | 60.23 $\pm$ 1.70        | 80.57 $\pm$ 0.65        |               |
| GroupDRO   | 83.79 $\pm$ 0.68        | 59.50 $\pm$ 2.21        | 82.03 $\pm$ 1.45        | 58.98 $\pm$ 1.84        | 88.28 $\pm$ 0.84        | 45.42 $\pm$ 3.34        | 84.41 $\pm$ 1.72        | 61.37 $\pm$ 2.79        | 80.27 $\pm$ 0.90        |               |
| DANN       | 83.90 $\pm$ 0.68        | 58.68 $\pm$ 3.02        | 82.17 $\pm$ 2.49        | 58.68 $\pm$ 1.83        | 87.28 $\pm$ 1.12        | 43.26 $\pm$ 3.68        | 81.83 $\pm$ 2.56        | 65.27 $\pm$ 3.75        | 80.82 $\pm$ 0.64        |               |
| Deep Coral | <b>84.70</b> $\pm$ 1.17 | 59.72 $\pm$ 3.66        | <b>83.89</b> $\pm$ 0.83 | <b>60.11</b> $\pm$ 3.53 | 87.88 $\pm$ 0.57        | 47.56 $\pm$ 3.55        | 84.80 $\pm$ 1.17        | 62.28 $\pm$ 1.42        | 80.73 $\pm$ 0.83        |               |
| Mixup      | 83.16 $\pm$ 1.12        | 60.13 $\pm$ 2.06        | 82.03 $\pm$ 1.72        | 59.03 $\pm$ 3.07        | 87.64 $\pm$ 0.81        | 46.19 $\pm$ 4.40        | 81.20 $\pm$ 1.97        | 64.87 $\pm$ 1.77        | 80.28 $\pm$ 1.27        |               |
| DIR        | 80.46 $\pm$ 0.55        | 56.88 $\pm$ 1.54        | 79.98 $\pm$ 1.36        | 57.11 $\pm$ 1.43        | 79.19 $\pm$ 0.76        | <b>68.33</b> $\pm$ 2.02 | 78.41 $\pm$ 3.08        | <b>72.61</b> $\pm$ 2.03 | 79.40 $\pm$ 0.60        |               |

Table 5: Performance on GOOD-PCBA with scaffold domain.

| GOOD-PCBA  | scaffold           |                    |                    |                    |                    |                    |                    |                    |                    |
|------------|--------------------|--------------------|--------------------|--------------------|--------------------|--------------------|--------------------|--------------------|--------------------|
|            | covariate          |                    |                    |                    | concept            |                    |                    |                    | no shift           |
|            | ID validation      |                    | OOD validation     |                    | ID validation      |                    | OOD validation     |                    | ID validation      |
| AP         | ID test            | OOD test           | ID test            |
| ERM        | 33.45±0.42         | 16.87±0.49         | 32.62±1.02         | 16.89±0.55         | 25.95±0.94         | 21.34±0.89         | 25.95±1.06         | 21.63±0.97         | 33.77±0.31         |
| IRM        | 33.56±0.57         | 16.94±0.35         | 32.86±0.65         | 16.90±0.42         | 25.89±0.42         | 21.05±0.39         | 25.78±0.62         | 21.22±0.39         | 33.36±0.31         |
| VREx       | <b>33.88</b> ±0.74 | 17.01±0.27         | <b>33.27</b> ±1.18 | <b>16.98</b> ±0.29 | <b>26.62</b> ±0.64 | 21.98±0.86         | 26.45±0.73         | 22.02±0.88         | 33.61±0.49         |
| GroupDRO   | 33.81±0.55         | <b>17.06</b> ±0.28 | 32.32±0.88         | 16.98±0.26         | 26.32±0.41         | 21.61±0.53         | 26.03±0.75         | 21.83±0.61         | 33.35±0.53         |
| DANN       | 33.63±0.46         | 16.86±0.46         | 32.62±0.90         | 16.90±0.33         | 26.07±0.29         | 21.23±0.44         | 25.99±0.46         | 21.64±0.37         | 33.47±0.32         |
| Deep Coral | 33.47±0.57         | 16.84±0.55         | 32.50±1.49         | 16.93±0.59         | 26.38±0.82         | 21.70±0.66         | <b>26.46</b> ±0.83 | 21.95±0.76         | <b>33.77</b> ±0.48 |
| Mixup      | 30.22±0.33         | 16.68±0.37         | 29.92±0.46         | 16.59±0.42         | 23.73±0.53         | 19.58±0.56         | 23.25±0.79         | 19.78±0.44         | 30.35±0.26         |
| DIR        | 32.55±0.17         | 14.97±0.35         | 30.58±0.34         | 14.98±0.32         | 25.85±0.37         | <b>22.26</b> ±0.50 | 25.55±0.25         | <b>22.20</b> ±0.43 | 30.50±0.69         |

Table 6: Performance on GOOD-PCBA with size domain.

| GOOD-PCBA  | size               |                    |                    |                    |                    |                    |                    |                    |                    |
|------------|--------------------|--------------------|--------------------|--------------------|--------------------|--------------------|--------------------|--------------------|--------------------|
|            | covariate          |                    |                    |                    | concept            |                    |                    |                    | no shift           |
|            | ID validation      |                    | OOD validation     |                    | ID validation      |                    | OOD validation     |                    | ID validation      |
| AP         | ID test            | OOD test           | ID test            |
| ERM        | 34.31±0.57         | 17.81±0.43         | 34.29±0.56         | 17.86±0.38         | 32.54±0.83         | 14.83±0.61         | 31.96±0.93         | 15.36±0.54         | 33.77±0.31         |
| IRM        | 34.28±0.46         | <b>17.94</b> ±0.30 | 34.29±0.54         | <b>18.05</b> ±0.29 | 32.99±0.89         | 15.76±0.54         | 32.55±0.89         | 16.07±0.52         | 33.36±0.31         |
| VREx       | 34.09±0.29         | 17.76±0.43         | 34.07±0.28         | 17.79±0.41         | 32.49±0.76         | 15.22±0.53         | 32.06±0.74         | 15.59±0.57         | 33.61±0.49         |
| GroupDRO   | 33.95±0.51         | 17.49±0.46         | 33.92±0.45         | 17.59±0.46         | <b>33.03</b> ±0.32 | 15.62±0.53         | <b>32.58</b> ±0.45 | 15.99±0.43         | 33.35±0.53         |
| DANN       | 34.17±0.34         | 17.86±0.47         | 34.09±0.34         | 17.86±0.48         | 32.74±0.50         | 15.40±0.46         | 32.25±0.77         | 15.78±0.39         | 33.47±0.32         |
| Deep Coral | <b>34.49</b> ±0.43 | 17.76±0.39         | <b>34.41</b> ±0.43 | 17.94±0.38         | 32.67±1.01         | 15.63±0.77         | 32.14±1.21         | 16.20±0.72         | <b>33.77</b> ±0.48 |
| Mixup      | 30.63±0.65         | 17.09±0.58         | 30.55±0.72         | 17.06±0.54         | 30.23±1.02         | 13.00±0.81         | 29.97±1.13         | 13.36±0.66         | 30.35±0.26         |
| DIR        | 32.89±0.20         | 16.39±0.28         | 32.62±0.04         | 16.61±0.17         | 30.53±0.28         | <b>16.60</b> ±0.43 | 30.32±0.21         | <b>16.86</b> ±0.26 | 30.50±0.69         |

Table 7: Performance on GOOD-ZINC with scaffold domain.

| GOOD-ZINC  | scaffold              |                       |                       |                       |                       |                       |                       |                       |                       |
|------------|-----------------------|-----------------------|-----------------------|-----------------------|-----------------------|-----------------------|-----------------------|-----------------------|-----------------------|
|            | covariate             |                       |                       |                       | concept               |                       |                       |                       | no shift              |
|            | ID validation         |                       | OOD validation        |                       | ID validation         |                       | OOD validation        |                       | ID validation         |
| MAE        | ID test               | OOD test              | ID test               |
| ERM        | 0.1224±0.0029         | 0.1825±0.0129         | 0.1384±0.0075         | 0.1995±0.0114         | 0.1222±0.0052         | 0.1328±0.0060         | 0.1225±0.0055         | 0.1306±0.0038         | 0.1233±0.0045         |
| IRM        | 0.1213±0.0044         | 0.1787±0.0094         | 0.1463±0.0128         | 0.2025±0.0145         | 0.1225±0.0036         | 0.1319±0.0039         | 0.1223±0.0035         | 0.1314±0.0042         | 0.1200±0.0049         |
| VREx       | 0.1211±0.0025         | 0.1771±0.0099         | 0.1512±0.0130         | 0.2094±0.0118         | 0.1186±0.0035         | 0.1273±0.0044         | 0.1186±0.0036         | 0.1270±0.0040         | 0.1247±0.0021         |
| GroupDRO   | <b>0.1168</b> ±0.0045 | 0.1784±0.0083         | <b>0.1373</b> ±0.0079 | <b>0.1934</b> ±0.0114 | 0.1207±0.0037         | 0.1284±0.0042         | 0.1210±0.0038         | 0.1281±0.0041         | 0.1222±0.0059         |
| DANN       | 0.1186±0.0030         | 0.1762±0.0108         | 0.1404±0.0133         | 0.2004±0.0113         | <b>0.1172</b> ±0.0044 | <b>0.1262</b> ±0.0051 | <b>0.1171</b> ±0.0040 | <b>0.1256</b> ±0.0048 | 0.1217±0.0057         |
| Deep Coral | 0.1185±0.0045         | <b>0.1752</b> ±0.0080 | 0.1438±0.0097         | 0.2036±0.0158         | 0.1187±0.0066         | 0.1287±0.0077         | 0.1191±0.0070         | 0.1279±0.0067         | <b>0.1156</b> ±0.0055 |
| Mixup      | 0.1279±0.0056         | 0.1951±0.0124         | 0.1575±0.0191         | 0.2240±0.0258         | 0.1353±0.0068         | 0.1479±0.0056         | 0.1357±0.0067         | 0.1475±0.0059         | 0.1418±0.0064         |
| DIR        | 0.3799±0.0321         | 0.6155±0.0589         | 0.3980±0.0401         | 0.6493±0.0717         | 0.3501±0.1102         | 0.3883±0.1019         | 0.3523±0.1074         | 0.3865±0.1040         | 0.6623±0.3615         |

Table 8: Performance on GOOD-ZINC with size domain.

| GOOD-ZINC  | size                  |                       |                       |                       |                       |                       |                       |                       |                       |
|------------|-----------------------|-----------------------|-----------------------|-----------------------|-----------------------|-----------------------|-----------------------|-----------------------|-----------------------|
|            | covariate             |                       |                       |                       | concept               |                       |                       |                       | no shift              |
|            | ID validation         |                       | OOD validation        |                       | ID validation         |                       | OOD validation        |                       | ID validation         |
| MAE        | ID test               | OOD test              | ID test               |
| ERM        | 0.1199±0.0060         | 0.2569±0.0138         | 0.1323±0.0092         | 0.2427±0.0068         | 0.1315±0.0073         | 0.1418±0.0057         | 0.1346±0.0079         | 0.1403±0.0065         | 0.1233±0.0045         |
| IRM        | 0.1222±0.0059         | <b>0.2536</b> ±0.0227 | 0.1317±0.0100         | 0.2403±0.0106         | 0.1278±0.0077         | 0.1403±0.0138         | 0.1302±0.0084         | 0.1368±0.0119         | 0.1200±0.0049         |
| VREx       | 0.1234±0.0054         | 0.2560±0.0212         | 0.1327±0.0089         | <b>0.2384</b> ±0.0098 | 0.1309±0.0064         | 0.1462±0.0139         | 0.1352±0.0092         | 0.1419±0.0090         | 0.1247±0.0021         |
| GroupDRO   | 0.1180±0.0054         | 0.2598±0.0213         | 0.1293±0.0069         | 0.2423±0.0097         | <b>0.1251</b> ±0.0066 | 0.1402±0.0091         | <b>0.1273</b> ±0.0089 | 0.1369±0.0076         | 0.1222±0.0059         |
| DANN       | 0.1188±0.0048         | 0.2555±0.0183         | 0.1303±0.0057         | 0.2439±0.0056         | 0.1253±0.0034         | <b>0.1371</b> ±0.0084 | 0.1297±0.0055         | <b>0.1339</b> ±0.0048 | 0.1217±0.0057         |
| Deep Coral | <b>0.1134</b> ±0.0071 | 0.2545±0.0159         | <b>0.1269</b> ±0.0092 | 0.2505±0.0073         | 0.1287±0.0041         | 0.1415±0.0074         | 0.1310±0.0058         | 0.1370±0.0052         | <b>0.1156</b> ±0.0055 |
| Mixup      | 0.1255±0.0071         | 0.2776±0.0215         | 0.1317±0.0145         | 0.2748±0.0167         | 0.1423±0.0062         | 0.1599±0.0115         | 0.1459±0.0073         | 0.1522±0.0064         | 0.1418±0.0064         |
| DIR        | 0.1541±0.0036         | 0.6011±0.0147         | 0.1718±0.0097         | 0.5482±0.0279         | 0.2348±0.0455         | 0.3130±0.0747         | 0.2485±0.0361         | 0.2871±0.0958         | 0.6623±0.3615         |

Table 9: Performance on GOOD-SST2 with length domain.

| GOOD-SST2  | length             |                    |                    |                    |                    |                    |                    |                    |                    |
|------------|--------------------|--------------------|--------------------|--------------------|--------------------|--------------------|--------------------|--------------------|--------------------|
|            | covariate          |                    |                    |                    | concept            |                    |                    |                    | no shift           |
|            | ID validation      |                    | OOD validation     |                    | ID validation      |                    | OOD validation     |                    | ID validation      |
| Accuracy   | ID test            | OOD test           | ID test            |
| ERM        | <b>89.82</b> ±0.01 | 77.76±1.14         | 89.26±0.22         | 81.30±0.35         | <b>94.43</b> ±0.05 | 67.26±0.05         | <b>93.82</b> ±0.09 | 72.43±0.48         | 91.61±0.02         |
| IRM        | 89.41±0.11         | 78.22±2.20         | 88.83±0.35         | 79.91±1.97         | 94.10±0.06         | 66.64±0.16         | 82.91±3.89         | <b>77.47</b> ±0.71 | 91.43±0.05         |
| VREx       | 89.51±0.03         | 79.60±1.05         | 89.57±0.09         | 80.64±0.35         | 94.26±0.02         | <b>69.14</b> ±0.86 | 92.93±0.26         | 73.16±0.47         | 91.61±0.18         |
| GroupDRO   | 89.59±0.09         | 79.21±1.02         | <b>89.66</b> ±0.04 | <b>81.35</b> ±0.54 | 94.41±0.07         | 67.30±0.41         | 93.00±0.49         | 71.86±0.23         | 91.66±0.19         |
| DANN       | 89.60±0.19         | 76.15±1.34         | 89.50±0.13         | 79.71±1.35         | 94.02±0.10         | 66.55±1.08         | 90.47±1.14         | 76.03±1.49         | 91.67±0.04         |
| Deep Coral | 89.68±0.06         | 78.99±0.43         | 88.99±0.36         | 79.81±0.22         | 94.25±0.18         | 67.84±0.78         | 93.42±0.38         | 72.34±0.51         | <b>91.89</b> ±0.15 |
| Mixup      | 89.78±0.20         | <b>80.22</b> ±0.60 | 89.62±0.09         | 80.88±0.60         | 94.12±0.10         | 67.31±0.74         | 93.18±0.10         | 73.34±0.40         | 91.69±0.04         |
| DIR        | 84.30±0.46         | 74.76±2.31         | 82.73±0.76         | 77.65±1.93         | 93.71±0.18         | 63.61±1.32         | 91.03±1.55         | 68.76±1.04         | 89.11±0.11         |

Table 10: Performance on GOOD-CMNIST with color domain.

| GOOD-CMNIST | color             |                   |                   |                   |                   |                   |                   |                   |                   |
|-------------|-------------------|-------------------|-------------------|-------------------|-------------------|-------------------|-------------------|-------------------|-------------------|
|             | covariate         |                   |                   |                   | concept           |                   |                   |                   | no shift          |
|             | ID validation     |                   | OOD validation    |                   | ID validation     |                   | OOD validation    |                   | ID validation     |
| Accuracy    | ID test           | OOD test          | ID test           |
| ERM         | 77.96±0.34        | <b>26.90±1.91</b> | 76.26±0.56        | 28.60±2.01        | 90.00±0.17        | 40.80±1.60        | 89.43±0.33        | 42.87±0.72        | <b>77.30±0.35</b> |
| IRM         | 77.92±0.30        | 25.81±2.70        | 75.91±2.89        | 27.83±1.84        | 90.02±0.12        | 41.70±0.54        | 89.44±0.43        | 42.80±0.38        | 77.28±0.21        |
| VREx        | 77.98±0.32        | 26.75±2.21        | 76.42±0.74        | 28.48±2.08        | 89.99±0.18        | 41.26±1.40        | 89.42±0.24        | 43.31±0.78        | 77.03±0.44        |
| GroupDRO    | 77.98±0.38        | 26.51±0.95        | <b>76.57±0.84</b> | 29.07±2.62        | <b>90.02±0.27</b> | 41.47±0.95        | 89.33±0.32        | <b>43.32±0.75</b> | 77.01±0.33        |
| DANN        | 78.00±0.43        | 26.82±1.64        | 76.02±1.77        | <b>29.14±2.93</b> | 89.94±0.19        | <b>41.86±0.68</b> | 89.49±0.39        | 43.11±0.64        | 77.15±0.48        |
| Deep Coral  | <b>78.64±0.48</b> | 26.16±1.59        | 76.11±1.60        | 29.05±2.19        | 89.94±0.17        | 41.28±0.86        | 89.42±0.28        | 43.16±0.56        | 77.12±0.32        |
| Mixup       | 77.40±0.22        | 26.24±2.43        | 74.86±1.13        | 26.47±1.73        | 89.95±0.25        | 39.59±1.11        | <b>89.63±0.31</b> | 40.96±0.81        | 76.62±0.37        |
| DIR         | 31.09±5.92        | 16.96±3.30        | 24.76±7.30        | 20.60±4.26        | 86.76±0.30        | 12.39±3.44        | 77.90±2.98        | 22.69±2.85        | 29.55±2.67        |

Table 11: Performance on GOOD-Motif with base domain.

| GOOD-Motif | base              |                   |                   |                   |                   |                   |                   |                   |                   |
|------------|-------------------|-------------------|-------------------|-------------------|-------------------|-------------------|-------------------|-------------------|-------------------|
|            | covariate         |                   |                   |                   | concept           |                   |                   |                   | no shift          |
|            | ID validation     |                   | OOD validation    |                   | ID validation     |                   | OOD validation    |                   | ID validation     |
| Accuracy   | ID test           | OOD test          | ID test           |
| ERM        | 92.60±0.03        | 69.97±1.94        | 92.43±0.20        | 68.66±3.43        | 92.02±0.05        | <b>80.87±0.65</b> | 92.05±0.04        | 81.44±0.45        | 92.09±0.04        |
| IRM        | 92.60±0.02        | 70.30±1.23        | 92.51±0.08        | 70.65±3.18        | 92.00±0.02        | 80.41±0.27        | 92.00±0.03        | 80.71±0.46        | 92.04±0.06        |
| VREx       | 92.60±0.03        | <b>72.23±2.28</b> | <b>92.52±0.12</b> | <b>71.47±2.75</b> | <b>92.05±0.06</b> | 80.71±0.79        | <b>92.06±0.04</b> | <b>81.56±0.35</b> | 92.09±0.07        |
| GroupDRO   | 92.61±0.03        | 70.29±2.02        | 92.48±0.13        | 68.24±1.94        | 92.01±0.04        | 80.32±0.57        | 92.02±0.05        | 81.43±0.70        | 92.09±0.08        |
| DANN       | 92.60±0.03        | 69.04±1.90        | 92.38±0.16        | 65.47±5.35        | 92.02±0.04        | 80.57±0.59        | 92.04±0.03        | 81.33±0.52        | <b>92.10±0.06</b> |
| Deep Coral | 92.61±0.03        | 70.43±1.44        | 92.37±0.27        | 68.88±3.61        | 92.01±0.05        | 80.27±0.72        | 92.04±0.03        | 81.37±0.42        | 92.09±0.07        |
| Mixup      | <b>92.68±0.05</b> | 69.30±1.00        | 92.48±0.17        | 70.08±2.06        | 91.89±0.03        | 77.57±0.56        | 91.89±0.01        | 77.63±0.57        | 92.04±0.06        |
| DIR        | 87.73±2.60        | 59.08±14.23       | 68.53±8.43        | 61.50±15.69       | 91.60±0.09        | 67.57±2.71        | 91.16±0.42        | 72.14±7.29        | 73.46±0.85        |

Table 12: Performance on GOOD-Motif with size domain.

| GOOD-Motif | size              |                   |                   |                   |                   |                   |                   |                   |                   |
|------------|-------------------|-------------------|-------------------|-------------------|-------------------|-------------------|-------------------|-------------------|-------------------|
|            | covariate         |                   |                   |                   | concept           |                   |                   |                   | no shift          |
|            | ID validation     |                   | OOD validation    |                   | ID validation     |                   | OOD validation    |                   | ID validation     |
| Accuracy   | ID test           | OOD test          | ID test           |
| ERM        | 92.28±0.10        | 51.28±1.94        | <b>92.13±0.16</b> | 51.74±2.27        | 91.73±0.10        | 69.41±0.91        | 91.78±0.16        | <b>70.75±0.56</b> | 92.09±0.04        |
| IRM        | 92.18±0.09        | 49.65±1.31        | 91.99±0.12        | 51.41±3.30        | 91.68±0.13        | 68.55±1.79        | 91.70±0.12        | 69.77±0.88        | 92.04±0.06        |
| VREx       | 92.25±0.08        | 48.87±0.99        | 92.09±0.14        | <b>52.67±2.87</b> | 91.67±0.13        | 68.73±1.23        | 91.76±0.20        | 70.24±0.72        | 92.09±0.07        |
| GroupDRO   | <b>92.29±0.09</b> | 49.21±1.50        | 92.12±0.10        | 51.95±2.80        | 91.67±0.14        | 68.28±1.50        | 91.74±0.15        | 69.98±0.86        | 92.09±0.08        |
| DANN       | 92.23±0.08        | 49.92±2.63        | 92.04±0.25        | 51.46±3.41        | <b>91.81±0.16</b> | <b>69.68±1.40</b> | 91.69±0.32        | 70.72±1.16        | <b>92.10±0.06</b> |
| Deep Coral | 92.22±0.13        | <b>52.70±3.04</b> | 92.05±0.13        | 50.97±1.76        | 91.68±0.10        | 68.76±0.95        | <b>91.78±0.09</b> | 70.49±0.84        | 92.09±0.07        |
| Mixup      | 92.02±0.10        | 49.98±2.19        | 91.90±0.14        | 51.48±3.35        | 91.45±0.13        | 66.42±1.07        | 91.39±0.22        | 67.81±1.13        | 92.04±0.06        |
| DIR        | 84.53±1.99        | 42.61±1.31        | 77.07±4.06        | 50.41±5.66        | 73.10±5.89        | 53.21±4.03        | 72.31±5.49        | 56.28±5.51        | 73.46±0.85        |

Table 13: Performance on GOOD-Cora with word domain.

| GOOD-Cora  | word              |                   |                   |                   |                   |                   |                   |                   |                   |
|------------|-------------------|-------------------|-------------------|-------------------|-------------------|-------------------|-------------------|-------------------|-------------------|
|            | covariate         |                   |                   |                   | concept           |                   |                   |                   | no shift          |
|            | ID validation     |                   | OOD validation    |                   | ID validation     |                   | OOD validation    |                   | ID validation     |
| Accuracy   | ID test           | OOD test          | ID test           |
| ERM        | 70.43±0.47        | 64.44±0.55        | 70.31±0.39        | 64.86±0.38        | 66.05±0.22        | 64.20±0.56        | 66.16±0.37        | 64.60±0.17        | 69.41±0.30        |
| IRM        | 70.27±0.33        | <b>64.83±0.25</b> | 70.07±0.23        | 64.77±0.36        | 66.09±0.32        | 64.16±0.61        | 66.19±0.36        | 64.60±0.16        | 69.42±0.38        |
| VREx       | 70.47±0.40        | 64.49±0.55        | 70.35±0.42        | 64.80±0.28        | 66.00±0.26        | 64.20±0.54        | 66.37±0.41        | 64.57±0.18        | 69.43±0.29        |
| GroupDRO   | 70.41±0.46        | 64.49±0.66        | 70.38±0.29        | 64.72±0.34        | 66.17±0.30        | 64.38±0.34        | 66.36±0.44        | <b>64.62±0.17</b> | 69.46±0.25        |
| DANN       | 70.66±0.36        | 64.72±0.22        | 70.51±0.47        | 64.77±0.42        | 66.16±0.31        | 64.29±0.33        | 66.14±0.41        | 64.51±0.19        | 69.25±0.33        |
| Deep Coral | 70.47±0.37        | 64.63±0.38        | 70.37±0.32        | 64.72±0.36        | 66.13±0.18        | 64.38±0.36        | 66.34±0.40        | 64.58±0.18        | 69.46±0.27        |
| Mixup      | <b>71.54±0.63</b> | 63.07±1.52        | <b>72.14±0.70</b> | <b>65.23±0.56</b> | <b>69.66±0.45</b> | 64.22±0.33        | <b>69.56±0.45</b> | 64.44±0.10        | <b>70.56±0.35</b> |
| EERM       | 68.79±0.34        | 60.80±0.61        | 69.23±0.13        | 61.98±0.10        | 65.75±0.15        | 63.35±0.03        | 65.88±0.21        | 63.09±0.36        | 70.10±0.22        |
| SRGNN      | 70.27±0.23        | 64.49±0.19        | 70.15±0.24        | 64.66±0.21        | 66.45±0.09        | <b>64.90±0.03</b> | 65.77±0.14        | <b>64.62±0.07</b> | 69.05±0.54        |

Table 14: Performance on GOOD-Cora with degree domain.

| GOOD-Cora  | degree            |                   |                   |                   |                   |                   |                   |                   |                   |
|------------|-------------------|-------------------|-------------------|-------------------|-------------------|-------------------|-------------------|-------------------|-------------------|
|            | covariate         |                   |                   |                   | concept           |                   |                   |                   | no shift          |
|            | ID validation     |                   | OOD validation    |                   | ID validation     |                   | OOD validation    |                   | ID validation     |
|            | ID test           | OOD test          | ID test           |
| ERM        | 72.27±0.57        | 55.76±0.82        | 72.51±0.57        | 56.30±0.49        | 68.71±0.56        | 60.38±0.33        | 68.43±0.28        | 60.54±0.44        | 69.42±0.30        |
| IRM        | 72.64±0.45        | 55.77±0.46        | 72.75±0.36        | 56.28±0.63        | 68.58±0.40        | 61.00±0.34        | 68.53±0.38        | 61.23±0.32        | 69.40±0.38        |
| VREx       | 72.25±0.65        | 55.46±0.87        | 72.49±0.59        | 56.30±0.50        | 68.45±0.44        | 60.05±0.72        | 68.37±0.33        | 60.58±0.42        | 69.42±0.29        |
| GroupDRO   | 72.18±0.58        | 55.44±0.91        | 72.66±0.41        | 56.29±0.43        | 68.37±0.79        | 60.03±0.88        | 68.34±0.25        | 60.65±0.31        | 69.40±0.30        |
| DANN       | 72.47±0.37        | 55.50±0.60        | 72.51±0.42        | 56.10±0.59        | 68.08±1.05        | 59.65±0.94        | 68.51±0.36        | 60.78±0.38        | 69.24±0.34        |
| Deep Coral | 72.16±0.53        | 55.52±0.93        | 72.57±0.37        | 56.35±0.38        | 68.38±0.76        | 60.22±0.55        | 68.30±0.30        | 60.58±0.40        | 69.43±0.30        |
| Mixup      | <b>74.57±0.54</b> | <b>57.21±1.12</b> | <b>74.34±0.56</b> | <b>58.20±0.67</b> | <b>70.32±0.59</b> | <b>63.49±0.23</b> | <b>70.44±0.53</b> | <b>63.65±0.39</b> | <b>70.87±0.47</b> |
| EERM       | 73.32±0.06        | 55.23±0.40        | 73.47±0.02        | 56.88±0.32        | 66.50±0.53        | 57.46±0.87        | 66.84±0.62        | 58.38±0.04        | 70.38±0.24        |
| SRGNN      | 71.37±0.04        | 54.67±0.36        | 71.20±0.47        | 54.78±0.10        | 68.34±0.90        | 59.96±0.89        | 68.94±0.29        | 61.08±0.09        | 69.08±0.53        |

Table 15: Performance on GOOD-Arxiv with time domain.

| GOOD-Arxiv | time              |                   |                   |                   |                   |                   |                   |                   |                   |
|------------|-------------------|-------------------|-------------------|-------------------|-------------------|-------------------|-------------------|-------------------|-------------------|
|            | covariate         |                   |                   |                   | concept           |                   |                   |                   | no shift          |
|            | ID validation     |                   | OOD validation    |                   | ID validation     |                   | OOD validation    |                   | ID validation     |
|            | ID test           | OOD test          | ID test           |
| ERM        | 72.69±0.19        | 70.64±0.47        | 72.66±0.17        | 71.08±0.23        | 74.76±0.18        | <b>65.70±0.42</b> | 73.68±0.49        | 67.32±0.24        | 73.02±0.14        |
| IRM        | 72.66±0.15        | 70.55±0.33        | 72.58±0.20        | 71.04±0.16        | 74.67±0.15        | 65.69±0.55        | 73.53±0.46        | 67.41±0.16        | 72.90±0.14        |
| VREx       | 72.66±0.18        | 70.54±0.33        | 72.58±0.21        | 71.12±0.24        | 74.80±0.14        | 65.40±0.54        | 73.72±0.43        | 67.37±0.27        | 72.84±0.09        |
| GroupDRO   | 72.68±0.17        | 70.67±0.31        | 72.46±0.26        | 71.15±0.20        | 74.73±0.18        | 65.57±0.66        | 73.55±0.34        | <b>67.45±0.15</b> | 72.91±0.12        |
| DANN       | <b>72.74±0.11</b> | 70.57±0.40        | <b>72.67±0.20</b> | 71.05±0.29        | 74.73±0.15        | 65.42±0.53        | 73.99±0.35        | 67.28±0.16        | 73.00±0.12        |
| Deep Coral | 72.66±0.18        | 70.59±0.29        | 72.54±0.09        | 71.07±0.21        | 74.77±0.16        | 65.53±0.63        | 73.40±0.32        | 67.42±0.22        | 72.95±0.09        |
| Mixup      | 72.49±0.26        | <b>71.05±0.31</b> | 72.55±0.23        | <b>71.34±0.14</b> | <b>74.92±0.32</b> | 64.01±0.50        | <b>74.55±0.18</b> | 64.84±0.59        | <b>73.19±0.16</b> |
| EERM       |                   |                   |                   |                   | out of memory     |                   |                   |                   |                   |
| SRGNN      | 72.50±0.09        | 70.70±0.42        | 72.34±0.08        | 70.83±0.10        | 74.64±0.10        | 65.37±0.22        | 73.88±0.14        | 67.17±0.23        | 72.99±0.04        |

Table 16: Performance on GOOD-Arxiv with degree domain.

| GOOD-Arxiv | degree            |                   |                   |                   |                   |                   |                   |                   |                   |
|------------|-------------------|-------------------|-------------------|-------------------|-------------------|-------------------|-------------------|-------------------|-------------------|
|            | covariate         |                   |                   |                   | concept           |                   |                   |                   | no shift          |
|            | ID validation     |                   | OOD validation    |                   | ID validation     |                   | OOD validation    |                   | ID validation     |
|            | ID test           | OOD test          | ID test           |
| ERM        | 77.47±0.12        | 58.53±0.16        | 77.18±0.23        | 58.91±0.23        | <b>75.27±0.16</b> | <b>61.77±0.29</b> | 74.74±0.19        | 62.99±0.20        | 72.99±0.12        |
| IRM        | 77.50±0.11        | <b>58.70±0.12</b> | 77.15±0.29        | 58.98±0.28        | 75.23±0.11        | 61.49±0.36        | 74.64±0.42        | 62.97±0.27        | 72.92±0.07        |
| VREx       | 77.49±0.11        | 58.59±0.21        | 77.33±0.17        | 58.99±0.16        | 75.19±0.14        | 61.61±0.32        | 74.64±0.22        | <b>63.00±0.33</b> | 72.88±0.09        |
| GroupDRO   | 77.46±0.18        | 58.46±0.21        | 77.16±0.20        | <b>59.08±0.16</b> | 75.19±0.14        | 61.59±0.56        | <b>74.92±0.20</b> | 62.88±0.24        | 72.98±0.10        |
| DANN       | 77.51±0.08        | 58.56±0.16        | 77.19±0.29        | 59.00±0.18        | 75.25±0.08        | 61.43±0.40        | 74.76±0.25        | 62.91±0.22        | 72.97±0.10        |
| Deep Coral | 77.48±0.13        | 58.63±0.21        | 77.16±0.26        | 58.97±0.20        | 75.16±0.15        | 61.77±0.37        | 74.89±0.12        | 62.85±0.29        | 72.91±0.12        |
| Mixup      | <b>77.61±0.15</b> | 57.43±0.27        | <b>77.47±0.29</b> | 57.60±0.31        | 72.75±0.38        | 60.60±1.01        | 72.31±0.84        | 61.28±0.87        | <b>73.03±0.14</b> |
| EERM       |                   |                   |                   |                   | out of memory     |                   |                   |                   |                   |
| SRGNN      | 75.96±0.08        | 57.48±0.07        | 75.98±0.13        | 57.52±0.10        | 74.83±0.20        | 61.74±0.10        | 74.30±0.07        | 62.09±0.58        | 72.99±0.02        |

Table 17: Performance on GOOD-Twitch with language domain.

| GOOD-Twitch | language          |                   |                   |                   |                   |                   |                   |                   |                   |
|-------------|-------------------|-------------------|-------------------|-------------------|-------------------|-------------------|-------------------|-------------------|-------------------|
|             | covariate         |                   |                   |                   | concept           |                   |                   |                   | no shift          |
|             | ID validation     |                   | OOD validation    |                   | ID validation     |                   | OOD validation    |                   | ID validation     |
|             | ID test           | OOD test          | ID test           |
| ERM         | 70.66±0.17        | 47.73±0.72        | 69.40±0.49        | 48.95±3.19        | 80.29±1.01        | 48.57±0.17        | 71.14±1.49        | 57.32±0.18        | 68.05±0.52        |
| IRM         | 69.75±0.80        | 48.05±0.16        | 67.92±0.48        | 47.21±0.98        | 77.05±0.60        | 49.77±0.82        | 67.35±0.84        | 59.17±0.85        | 68.30±0.29        |
| VREx        | 70.66±0.18        | 47.70±0.70        | 69.42±0.48        | 48.99±3.20        | 80.29±1.01        | 48.56±0.18        | 71.17±1.35        | 57.37±0.14        | 68.07±0.52        |
| GroupDRO    | 70.84±0.51        | 47.23±0.26        | 67.66±1.64        | 47.20±0.44        | 81.95±0.88        | 47.44±1.08        | 69.74±0.33        | <b>60.27±0.62</b> | 69.19±0.28        |
| DANN        | 70.67±0.18        | 47.72±0.73        | 69.42±0.48        | 48.98±3.22        | 80.28±0.99        | 48.57±0.18        | 70.94±1.43        | 57.46±0.14        | 68.07±0.52        |
| Deep Coral  | 70.67±0.28        | 46.64±0.70        | 68.72±0.71        | 49.64±2.44        | 80.14±0.49        | 47.46±0.32        | 69.70±0.68        | 56.97±0.23        | 68.29±0.65        |
| Mixup       | 71.30±0.14        | 51.33±1.50        | 70.39±0.62        | <b>52.27±0.78</b> | 78.89±0.60        | <b>51.87±0.37</b> | 69.08±0.59        | 55.28±0.12        | 67.09±0.34        |
| EERM        | <b>73.87±0.07</b> | <b>52.48±0.76</b> | <b>72.52±0.08</b> | 51.34±1.41        | <b>83.91±0.15</b> | 44.22±0.81        | <b>76.28±5.81</b> | 51.94±4.52        | <b>70.80±0.08</b> |
| SRGNN       | 70.58±0.53        | 46.17±0.98        | 70.02±0.35        | 47.30±1.43        | 80.21±0.59        | 48.27±1.10        | 71.73±1.13        | 56.05±0.22        | 67.69±0.13        |

Table 18: Performance on GOOD-WebKB with university domain.

| GOOD-WebKB | university        |                   |                   |                   |  |                   |                   |                   |                   |                   |
|------------|-------------------|-------------------|-------------------|-------------------|--|-------------------|-------------------|-------------------|-------------------|-------------------|
|            | covariate         |                   |                   |                   |  | concept           |                   |                   |                   | no shift          |
|            | ID validation     |                   | OOD validation    |                   |  | ID validation     |                   | OOD validation    |                   | ID validation     |
|            | ID test           | OOD test          | ID test           | OOD test          |  | ID test           | OOD test          | ID test           | OOD test          | ID test           |
| ERM        | 38.25±0.68        | 11.64±0.90        | 40.98±3.54        | 14.29±3.24        |  | 65.00±2.72        | 24.77±0.43        | 62.22±0.95        | 27.83±0.76        | 47.85±0.89        |
| IRM        | 39.34±2.04        | 11.91±2.62        | 45.90±0.77        | 13.49±0.75        |  | 65.56±3.40        | 24.16±0.80        | 60.00±0.79        | 27.52±0.43        | 47.31±1.21        |
| VREx       | 39.34±1.34        | 10.58±1.02        | 40.44±2.97        | 14.29±3.24        |  | 65.00±2.72        | 24.77±0.43        | 59.45±2.77        | 27.83±0.38        | 47.85±0.89        |
| GroupDRO   | 39.89±1.57        | 12.96±1.95        | 39.34±2.04        | 17.20±0.76        |  | 65.00±2.72        | 24.77±0.43        | 57.78±4.12        | 28.14±1.12        | 47.85±0.89        |
| DANN       | 39.89±1.03        | 15.34±1.02        | 41.53±2.87        | 15.08±0.37        |  | 65.00±2.72        | 24.77±0.43        | 59.45±0.95        | 26.91±0.63        | 47.85±0.89        |
| Deep Coral | 38.25±1.43        | 14.29±2.92        | 46.45±3.35        | 13.76±1.30        |  | 65.00±2.72        | 24.77±0.43        | 62.78±0.26        | 28.75±1.13        | 48.12±0.89        |
| Mixup      | <b>54.65±3.41</b> | 10.85±0.66        | <b>57.38±0.77</b> | 17.46±1.94        |  | <b>67.22±1.14</b> | <b>27.83±1.53</b> | <b>71.67±0.00</b> | <b>31.19±0.43</b> | 51.88±1.34        |
| EERM       | 46.99±1.69        | 11.90±0.37        | 33.88±4.92        | <b>24.61±4.86</b> |  | 61.67±2.08        | 24.77±0.43        | 61.11±1.46        | 27.83±4.12        | 50.54±0.46        |
| SRGNN      | 39.89±1.36        | <b>16.14±3.35</b> | 38.25±1.57        | 13.23±2.93        |  | 61.67±0.00        | 25.08±1.13        | 61.11±0.26        | 27.52±0.43        | <b>52.96±1.04</b> |

Table 19: Performance on GOOD-CBAS with color domain.

| GOOD-CBAS  | color             |                   |                   |                   |  |                   |                   |                   |                   |                    |
|------------|-------------------|-------------------|-------------------|-------------------|--|-------------------|-------------------|-------------------|-------------------|--------------------|
|            | covariate         |                   |                   |                   |  | concept           |                   |                   |                   | no shift           |
|            | ID validation     |                   | OOD validation    |                   |  | ID validation     |                   | OOD validation    |                   | ID validation      |
|            | ID test           | OOD test          | ID test           | OOD test          |  | ID test           | OOD test          | ID test           | OOD test          | ID test            |
| ERM        | 89.29±3.16        | 77.57±2.96        | <b>89.72±3.20</b> | 76.00±3.00        |  | 89.79±1.18        | 82.22±1.81        | 90.14±1.10        | 82.36±0.97        | 99.43±0.45         |
| IRM        | 91.00±1.28        | 77.00±2.21        | 87.43±4.05        | 76.00±3.39        |  | 90.71±0.87        | 81.50±1.46        | 90.21±0.91        | <b>83.21±0.54</b> | 99.64±0.46         |
| VREx       | <b>91.14±2.72</b> | 77.71±2.03        | 88.43±1.81        | 77.14±1.43        |  | 89.50±1.13        | <b>82.50±1.47</b> | 90.21±0.96        | 82.86±1.26        | 99.64±0.46         |
| GroupDRO   | 90.86±2.92        | 77.71±2.00        | 89.71±2.12        | 76.14±1.78        |  | 90.36±0.91        | 81.22±1.78        | 91.00±1.01        | 82.00±1.46        | 99.72±0.33         |
| DANN       | 90.14±3.16        | <b>79.14±2.40</b> | 86.71±4.78        | <b>77.57±2.86</b> |  | 89.93±1.25        | 80.50±1.31        | 89.78±1.01        | 82.50±0.72        | 99.65±0.33         |
| Deep Coral | <b>91.14±2.02</b> | 77.86±2.22        | 88.14±2.43        | 75.86±3.06        |  | 89.36±1.87        | 81.93±1.36        | 90.14±0.98        | 82.64±1.40        | 99.79±0.28         |
| Mixup      | 73.57±8.72        | 73.72±6.60        | 73.00±9.27        | 70.57±7.41        |  | <b>93.64±0.57</b> | 63.57±1.43        | <b>92.86±1.19</b> | 64.57±1.81        | 98.43±1.72         |
| EERM       | 67.62±4.08        | 68.10±4.12        | 57.62±7.19        | 52.86±13.75       |  | 78.33±0.11        | 63.10±0.96        | 80.48±0.49        | 64.29±0.00        | 89.05±0.30         |
| SRGNN      | 77.62±1.84        | 73.81±1.75        | 82.86±1.78        | 74.29±4.10        |  | 88.57±0.58        | 80.24±0.49        | 89.76±0.96        | 81.43±0.34        | <b>100.00±0.00</b> |

## D.2 Metric score curves

We also report the metric score curves for 11 datasets in Fig. 1-11. Note that we only include the curves for ERM with all splits, while all curve figures for other algorithms are available at our GitHub repository.

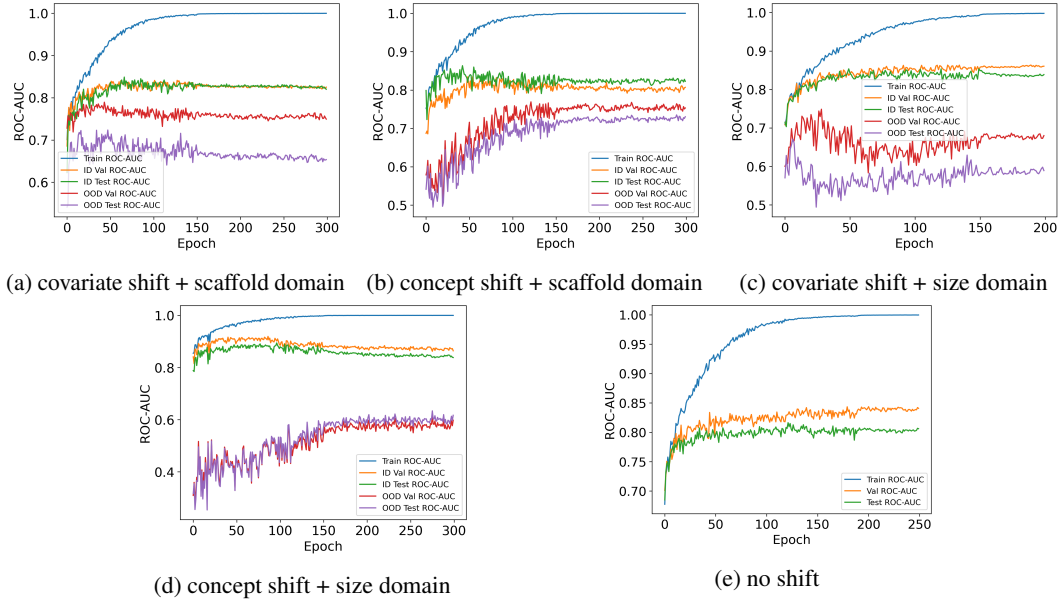

Figure 1: Metric score curves for ERM on GOOD-HIV. Note that we omit the domain selection for no shift since the two cases make no difference in results.

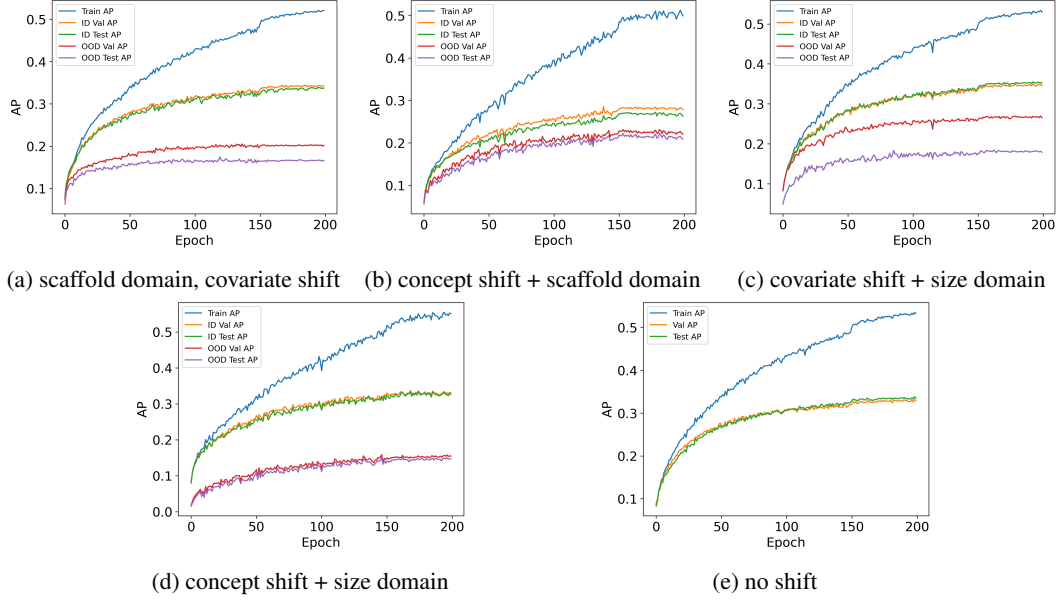

Figure 2: Metric score curves for ERM on GOOD-PCBA.

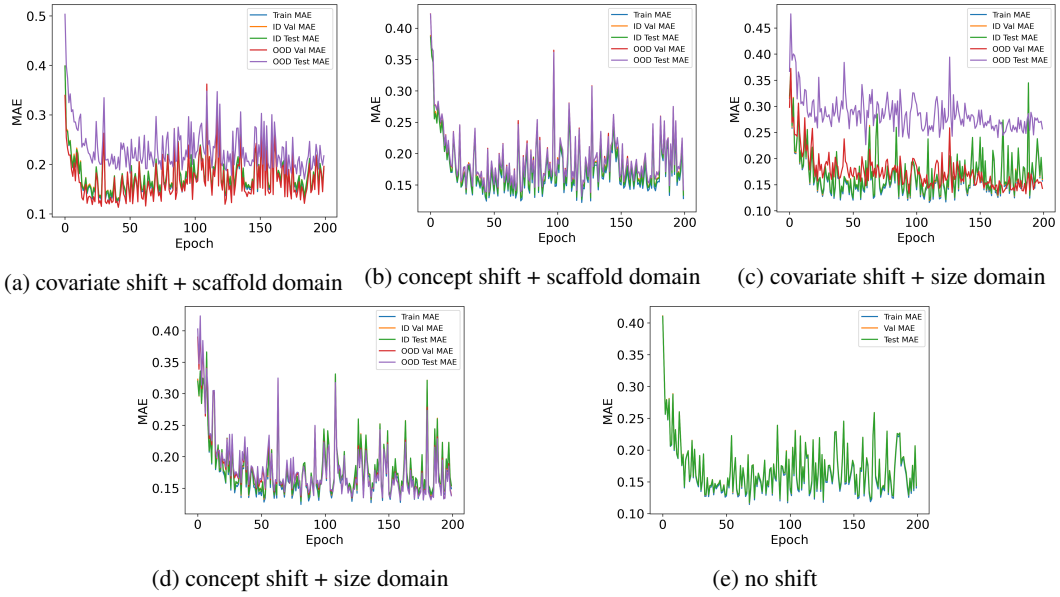

Figure 3: Metric score curves for ERM on GOOD-ZINC.

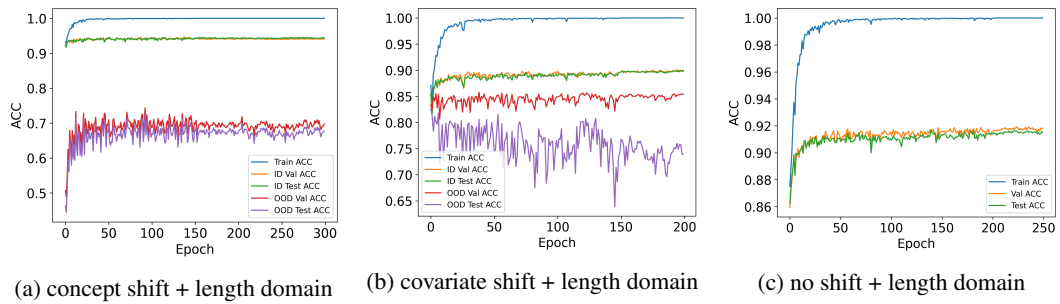

Figure 4: Metric score curves for ERM on GOOD-SST2.

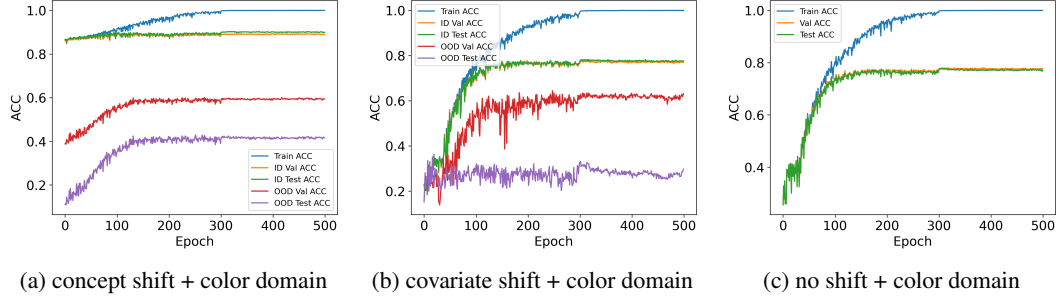

Figure 5: Metric score curves for ERM on GOOD-CMNIST.

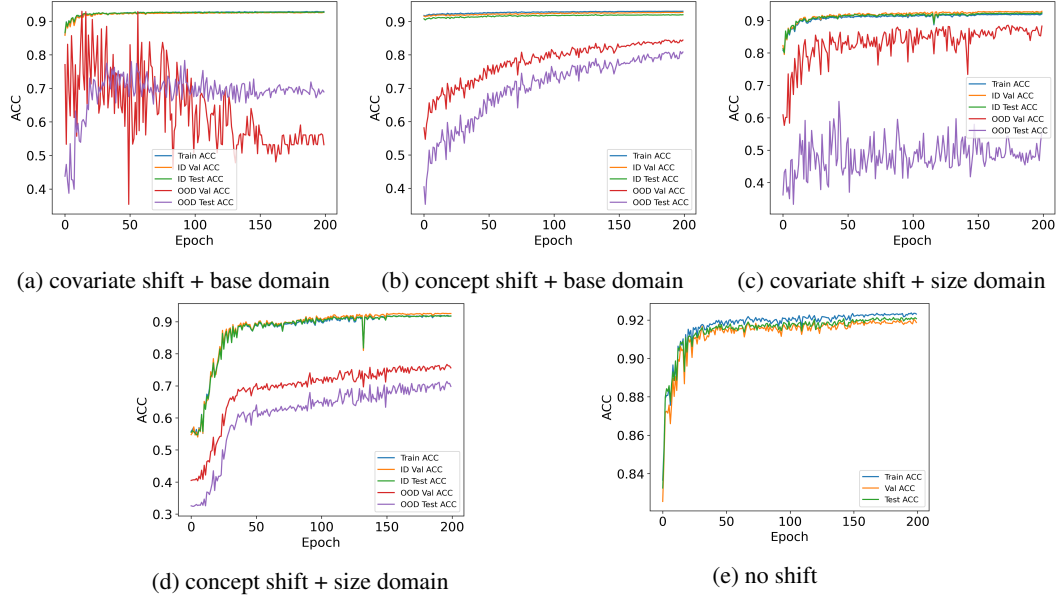

Figure 6: Metric score curves for ERM on GOOD-Motif.

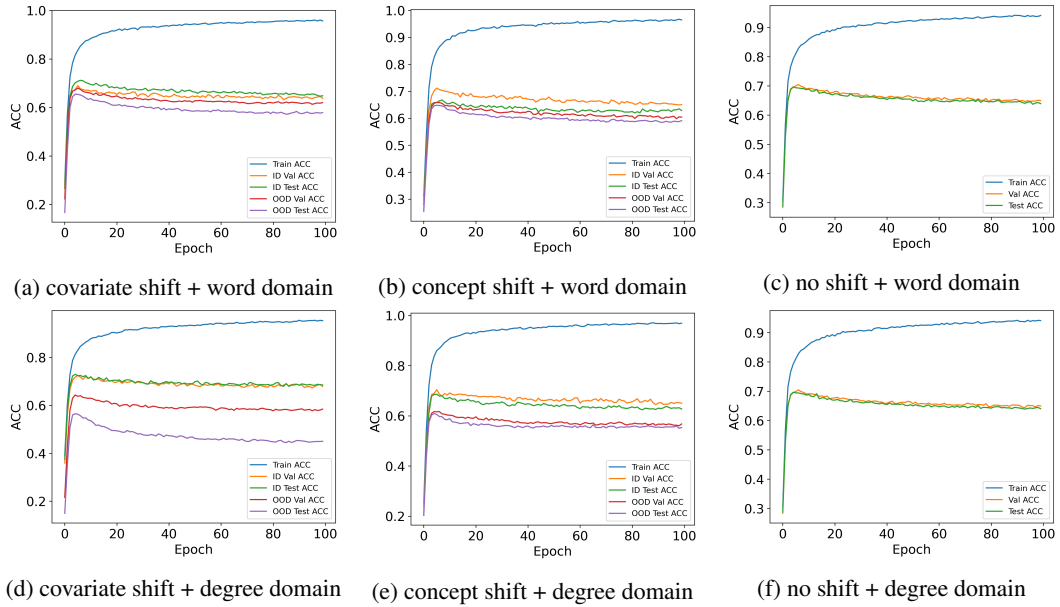

Figure 7: Metric score curves for ERM on GOOD-Cora.

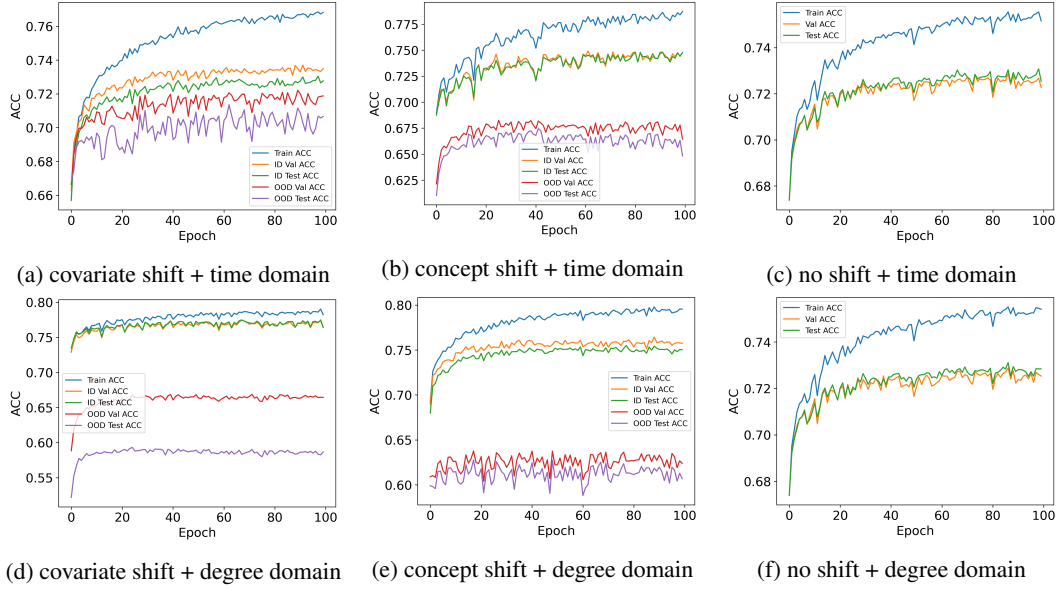

Figure 8: Metric score curves for ERM on GOOD-Arxiv.

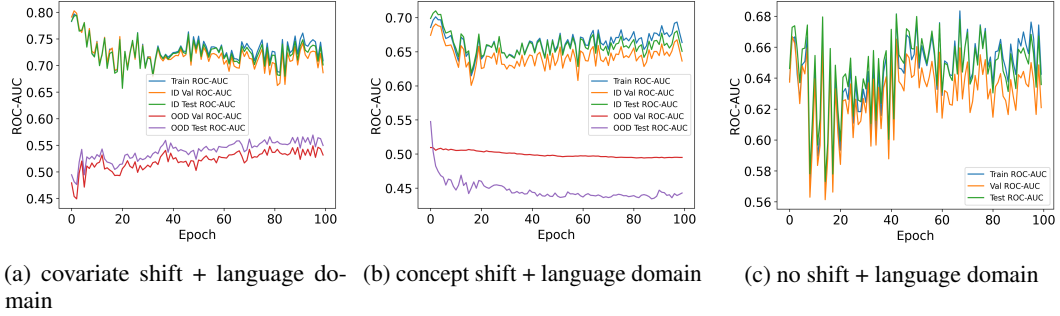

Figure 9: Metric score curves for ERM on GOOD-Twitch.

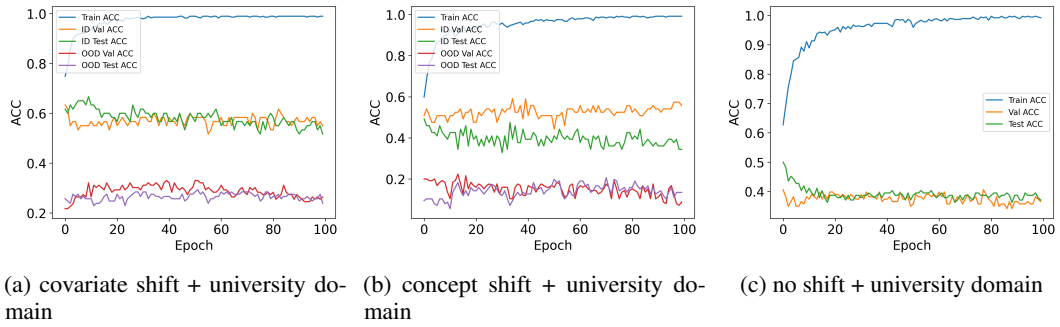

Figure 10: Metric score curves for ERM on GOOD-WebKB.

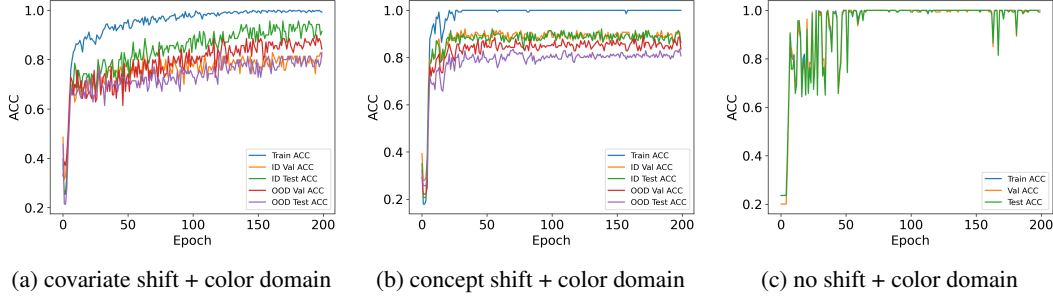

Figure 11: Metric score curves for ERM on GOOD-CBAS.

### D.3 Comparison between training, validation and test scores

To directly view performance gaps between training and test data, we compare training, validation, and test scores in Table 20. These comparisons reveal the distribution shift by definition.

Table 20: Comparison between training, validation and test scores for ERM on 11 datasets. The scores are evaluated on the final model of a random run.  $\uparrow$  indicates higher values correspond to better performance while  $\downarrow$  indicates lower values for better performance.

| Dataset                | Domain     | Shift     | ID validation |            |         |          | OOD validation |            |         |          |
|------------------------|------------|-----------|---------------|------------|---------|----------|----------------|------------|---------|----------|
|                        |            |           | Train         | Validation | ID test | OOD test | Train          | Validation | ID test | OOD test |
| GOOD-HIV $\uparrow$    | scaffold   | covariate | 99.40         | 84.11      | 82.62   | 68.65    | 91.63          | 78.94      | 81.49   | 69.57    |
|                        |            | concept   | 94.04         | 83.56      | 82.63   | 58.28    | 99.56          | 76.92      | 80.55   | 72.43    |
|                        | size       | covariate | 99.76         | 86.34      | 83.58   | 59.26    | 87.84          | 74.86      | 82.14   | 54.68    |
|                        |            | concept   | 98.53         | 91.93      | 88.38   | 50.07    | 99.97          | 61.48      | 83.89   | 63.38    |
| GOOD-PCBA $\uparrow$   | scaffold   | covariate | 51.57         | 33.74      | 32.75   | 17.01    | 47.95          | 20.75      | 32.76   | 16.49    |
|                        |            | concept   | 47.86         | 28.42      | 25.86   | 20.40    | 49.57          | 22.00      | 26.08   | 21.24    |
|                        | size       | covariate | 52.91         | 33.89      | 34.17   | 18.26    | 52.91          | 27.23      | 34.17   | 18.26    |
|                        |            | concept   | 55.16         | 34.56      | 33.64   | 16.45    | 55.78          | 17.32      | 33.36   | 16.49    |
| GOOD-ZINC $\downarrow$ | scaffold   | covariate | 0.1183        | 0.1224     | 0.1224  | 0.1895   | 0.1380         | 0.1421     | 0.1409  | 0.2159   |
|                        |            | concept   | 0.1074        | 0.1138     | 0.1128  | 0.1243   | 0.1086         | 0.1232     | 0.1141  | 0.1239   |
|                        | size       | covariate | 0.1167        | 0.1215     | 0.1214  | 0.2581   | 0.1210         | 0.1313     | 0.1259  | 0.2352   |
|                        |            | concept   | 0.1117        | 0.1142     | 0.1162  | 0.1370   | 0.1244         | 0.1286     | 0.1298  | 0.1279   |
| GOOD-SST2 $\uparrow$   | length     | covariate | 100.00        | 90.10      | 89.81   | 76.03    | 99.79          | 85.78      | 88.74   | 80.58    |
|                        |            | concept   | 100.00        | 94.64      | 94.39   | 67.13    | 99.90          | 74.34      | 93.96   | 72.41    |
| GOOD-CMNIST $\uparrow$ | color      | covariate | 93.54         | 77.83      | 77.17   | 26.39    | 97.07          | 64.39      | 76.97   | 29.49    |
|                        |            | concept   | 92.15         | 89.46      | 90.00   | 36.68    | 99.13          | 60.01      | 89.40   | 42.60    |
| GOOD-Motif $\uparrow$  | base       | covariate | 92.90         | 92.70      | 92.67   | 70.43    | 91.60          | 90.53      | 91.93   | 66.57    |
|                        |            | concept   | 93.06         | 92.74      | 91.96   | 80.37    | 93.08          | 84.45      | 92.00   | 80.78    |
|                        | size       | covariate | 92.06         | 92.87      | 92.40   | 55.63    | 91.85          | 88.57      | 92.17   | 54.33    |
|                        |            | concept   | 91.80         | 92.63      | 91.81   | 69.93    | 91.97          | 76.67      | 91.81   | 71.35    |
| GOOD-Cora $\uparrow$   | word       | covariate | 83.61         | 69.02      | 70.79   | 65.38    | 83.61          | 67.98      | 70.79   | 65.38    |
|                        |            | concept   | 84.96         | 71.22      | 65.77   | 64.84    | 84.96          | 65.92      | 65.77   | 64.84    |
|                        | degree     | covariate | 82.98         | 72.46      | 72.36   | 56.25    | 81.29          | 64.30      | 72.92   | 56.49    |
|                        |            | concept   | 85.98         | 70.41      | 68.61   | 60.51    | 83.80          | 61.68      | 68.49   | 60.93    |
| GOOD-Arxiv $\uparrow$  | time       | covariate | 76.74         | 73.70      | 73.00   | 70.30    | 76.69          | 72.21      | 72.66   | 71.16    |
|                        |            | concept   | 78.23         | 74.92      | 74.51   | 65.17    | 76.17          | 68.25      | 73.39   | 67.01    |
|                        | degree     | covariate | 79.02         | 77.50      | 77.39   | 58.27    | 78.48          | 66.89      | 76.96   | 59.03    |
|                        |            | concept   | 79.79         | 76.43      | 75.43   | 61.85    | 77.33          | 63.77      | 74.41   | 62.75    |
| GOOD-Twitch $\uparrow$ | language   | covariate | 70.11         | 69.06      | 70.98   | 48.24    | 68.55          | 50.95      | 69.87   | 54.76    |
|                        |            | concept   | 79.67         | 80.26      | 79.27   | 48.15    | 74.84          | 54.89      | 73.81   | 56.92    |
| GOOD-WebKB $\uparrow$  | university | covariate | 95.08         | 59.02      | 39.34   | 9.52     | 90.57          | 22.40      | 34.43   | 18.25    |
|                        |            | concept   | 74.82         | 63.33      | 61.67   | 25.69    | 98.58          | 33.02      | 60.00   | 26.61    |
| GOOD-CBAS $\uparrow$   | color      | covariate | 94.05         | 82.86      | 82.86   | 70.00    | 99.76          | 80.00      | 91.43   | 77.14    |
|                        |            | concept   | 100.00        | 92.14      | 87.86   | 82.86    | 100.00         | 89.29      | 90.71   | 81.43    |

## E Complete OOD Parameter Selections

Following Appendix B, in this section we specify the hyperparameter tune set and selection for each algorithm on each dataset in Table 21-31.

Table 21: OOD hyperparameter selections on GOOD-HIV.

| GOOD-HIV   | tune set |        |       | scaffold  |         |          | size      |         |          |
|------------|----------|--------|-------|-----------|---------|----------|-----------|---------|----------|
|            |          |        |       | covariate | concept | no shift | covariate | concept | no shift |
| ERM        | —        | —      | —     | —         | —       | —        | —         | —       | —        |
| IRM        | 10.0     | 0.1    | 1.0   | 1.0       | 0.1     | 0.1      | 10.0      | 0.1     | 0.1      |
| VREx       | 10.0     | 1000.0 | 100.0 | 100.0     | 10.0    | 100.0    | 10.0      | 1000.0  | 100.0    |
| GroupDRO   | 0.01     | 0.1    | 0.001 | 0.1       | 0.01    | 0.001    | 0.01      | 0.001   | 0.001    |
| DANN       | 0.1      | 1.0    | 0.01  | 1.0       | 0.1     | 0.01     | 0.01      | 1.0     | 0.01     |
| Deep Coral | 0.01     | 1.0    | 0.1   | 0.1       | 0.01    | 0.01     | 0.1       | 0.01    | 0.01     |
| Mixup      | 1.0      | 2.0    | 0.4   | 2.0       | 0.4     | 2.0      | 2.0       | 0.4     | 2.0      |
| DIR        | 0.4      | 0.6    | 0.8   | 0.8       | 0.8     | 0.8      | 0.8       | 0.8     | 0.8      |

Table 22: OOD hyperparameter selections on GOOD-PCBA.

| GOOD-PCBA  | tune set |       |      | scaffold  |         |          | size      |         |          |
|------------|----------|-------|------|-----------|---------|----------|-----------|---------|----------|
|            |          |       |      | covariate | concept | no shift | covariate | concept | no shift |
| ERM        | —        | —     | —    | —         | —       | —        | —         | —       | —        |
| IRM        | 1.0      | 0.1   | 10.0 | 0.1       | 0.1     | 0.1      | 0.1       | 1.0     | 0.1      |
| VREx       | 10.0     | 100.0 | 1.0  | 10.0      | 100.0   | 10.0     | 1.0       | 10.0    | 10.0     |
| GroupDRO   | 0.01     | 0.001 | 0.1  | 0.01      | 0.001   | 0.1      | 0.01      | 0.01    | 0.1      |
| DANN       | 0.01     | 0.001 | 0.1  | 0.01      | 0.01    | 0.01     | 0.01      | 0.01    | 0.01     |
| Deep Coral | 0.1      | 0.01  | 1.0  | 0.01      | 0.1     | 1.0      | 0.1       | 0.1     | 1.0      |
| Mixup      | 1.0      | 2.0   | 0.4  | 1.0       | 2.0     | 1.0      | 2.0       | 1.0     | 1.0      |
| DIR        | 0.4      | 0.6   | 0.8  | 0.8       | 0.8     | 0.8      | 0.8       | 0.8     | 0.8      |

Table 23: OOD hyperparameter selections on GOOD-ZINC.

| GOOD-ZINC  | tune set |       |        | scaffold  |         |          | size      |         |          |
|------------|----------|-------|--------|-----------|---------|----------|-----------|---------|----------|
|            |          |       |        | covariate | concept | no shift | covariate | concept | no shift |
| ERM        | —        | —     | —      | —         | —       | —        | —         | —       | —        |
| IRM        | 1.0      | 0.1   | 0.01   | 0.01      | 0.01    | 0.01     | 0.01      | 0.01    | 0.01     |
| VREx       | 100.0    | 10.0  | 1000.0 | 1000.0    | 100.0   | 100.0    | 1000.0    | 100.0   | 100.0    |
| GroupDRO   | 0.01     | 0.1   | 0.001  | 0.1       | 0.001   | 0.1      | 0.001     | 0.001   | 0.1      |
| DANN       | 0.01     | 0.001 | 0.1    | 0.001     | 0.001   | 0.1      | 0.01      | 0.1     | 0.1      |
| Deep Coral | 0.1      | 0.01  | 1.0    | 1.0       | 1.0     | 1.0      | 1.0       | 1.0     | 1.0      |
| Mixup      | 1.0      | 0.4   | 2.0    | 0.4       | 1.0     | 1.0      | 1.0       | 0.4     | 1.0      |
| DIR        | 0.4      | 0.6   | 0.8    | 0.8       | 0.8     | 0.8      | 0.8       | 0.8     | 0.8      |

Table 24: OOD hyperparameter selections on GOOD-SST2.

| GOOD-SST2  | tune set |       | length    |         |          |
|------------|----------|-------|-----------|---------|----------|
|            |          |       | covariate | concept | no shift |
| ERM        | —        | —     | —         | —       | —        |
| IRM        | 0.1      | 1.0   | 10.0      | 0.1     | 10.0     |
| VREx       | 1000.0   | 100.0 | 10.0      | 100.0   | 100.0    |
| GroupDRO   | 0.01     | 0.001 | 0.1       | 0.01    | 0.001    |
| DANN       | 0.1      | 0.01  | 1.0       | 0.01    | 0.1      |
| Deep Coral | 0.1      | 1.0   | 0.01      | 1.0     | 1.0      |
| Mixup      | 0.4      | 2.0   | 1.0       | 1.0     | 1.0      |
| DIR        | 0.6      | 0.7   | 0.8       | 0.8     | 0.7      |

Table 25: OOD hyperparameter selections on GOOD-CMNIST.

| GOOD-CMNIST | tune set |      |       | color     |         |          |
|-------------|----------|------|-------|-----------|---------|----------|
|             |          |      |       | covariate | concept | no shift |
| ERM         | –        | –    | –     | –         | –       | –        |
| IRM         | 0.1      | 1.0  | 0.01  | 0.1       | 0.1     | 1.0      |
| VREx        | 0.01     | 0.1  | 1.0   | 1.0       | 0.01    | 0.1      |
| GroupDRO    | 0.001    | 0.01 | 0.1   | 0.1       | 0.01    | 0.1      |
| DANN        | 0.1      | 0.01 | 0.001 | 0.1       | 0.01    | 0.001    |
| Deep Coral  | 0.1      | 0.01 | 0.001 | 0.1       | 0.0001  | 0.001    |
| Mixup       | 1.0      | 2.0  | 0.4   | 1.0       | 0.4     | 0.4      |
| DIR         | 0.4      | 0.6  | 0.8   | 0.6       | 0.6     | 0.6      |

Table 26: OOD hyperparameter selections on GOOD-Motif.

| GOOD-Motif | tune set |       |      | base      |         |          | size      |         |          |
|------------|----------|-------|------|-----------|---------|----------|-----------|---------|----------|
|            |          |       |      | covariate | concept | no shift | covariate | concept | no shift |
| ERM        | –        | –     | –    | –         | –       | –        | –         | –       | –        |
| IRM        | 1.0      | 10.0  | 0.1  | 0.1       | 0.1     | 0.1      | 0.1       | 0.1     | 0.1      |
| VREx       | 1000.0   | 100.0 | 10.0 | 1000.0    | 1000.0  | 1000.0   | 100.0     | 10.0    | 1000.0   |
| GroupDRO   | 0.001    | 0.01  | 0.1  | 0.001     | 0.001   | 0.1      | 0.1       | 0.01    | 0.1      |
| DANN       | 0.1      | 1.0   | 0.01 | 0.01      | 0.1     | 0.01     | 0.1       | 0.1     | 0.01     |
| Deep Coral | 1.0      | 0.1   | 0.01 | 1.0       | 0.1     | 0.1      | 1.0       | 0.01    | 0.1      |
| Mixup      | 1.0      | 2.0   | 0.4  | 2.0       | 0.4     | 0.4      | 1.0       | 0.4     | 0.4      |
| DIR        | 0.2      | 0.25  | 0.3  | 0.25      | 0.3     | 0.25     | 0.25      | 0.3     | 0.25     |

Table 27: OOD hyperparameter selections on GOOD-Cora.

| GOOD-Cora  | tune set                 |      |       | word      |         |          | degree    |         |          |
|------------|--------------------------|------|-------|-----------|---------|----------|-----------|---------|----------|
|            |                          |      |       | covariate | concept | no shift | covariate | concept | no shift |
| ERM        | –                        | –    | –     | –         | –       | –        | –         | –       | –        |
| IRM        | 0.1                      | 1.0  | 10.0  | 10.0      | 0.1     | 0.1      | 1.0       | 10.0    | 0.1      |
| VREx       | 100.0                    | 10.0 | 1.0   | 100.0     | 10.0    | 1.0      | 10.0      | 10.0    | 1.0      |
| GroupDRO   | 0.001                    | 0.01 | 0.1   | 0.1       | 0.01    | 0.01     | 0.1       | 0.01    | 0.01     |
| DANN       | 0.01                     | 0.1  | 0.001 | 0.001     | 0.1     | 0.001    | 0.01      | 0.1     | 0.001    |
| Deep Coral | 0.01                     | 0.1  | 1.0   | 0.01      | 0.01    | 1.0      | 1.0       | 0.1     | 0.01     |
| Mixup      | 0.4                      | 2.0  | 1.0   | 0.4       | 2.0     | 0.4      | 0.4       | 2.0     | 2.0      |
| EERM       | 1/3, 1e-2/5e-3/1e-2/1e-4 |      |       | 1,5e-3    | 3,1e-3  | 3,1e-2   | 3,5e-3    | 3,1e-3  | 3,1e-2   |
| SRGNN      | 1e-5                     | 1e-6 | 1e-4  | 1e-4      | 1e-5    | 1e-6     | 1e-5      | 1e-6    | 1e-6     |

Table 28: OOD hyperparameter selections on GOOD-Arxiv.

| GOOD-Arxiv | tune set |       |      | time      |         |          | degree    |         |          |
|------------|----------|-------|------|-----------|---------|----------|-----------|---------|----------|
|            |          |       |      | covariate | concept | no shift | covariate | concept | no shift |
| ERM        | –        | –     | –    | –         | –       | –        | –         | –       | –        |
| IRM        | 0.1      | 1.0   | 10.0 | 0.1       | 1.0     | 1.0      | 0.1       | 1.0     | 1.0      |
| VREx       | 1.0      | 100.0 | 10.0 | 100.0     | 1.0     | 100.0    | 1.0       | 100.0   | 1.0      |
| GroupDRO   | 0.001    | 0.01  | 0.1  | 0.01      | 0.001   | 0.1      | 0.1       | 0.001   | 0.1      |
| DANN       | 0.1      | 0.001 | 0.01 | 0.001     | 0.001   | 0.001    | 0.01      | 0.001   | 0.1      |
| Deep Coral | 0.1      | 0.01  | 1.0  | 0.1       | 1.0     | 1.0      | 0.1       | 1.0     | 0.1      |
| Mixup      | 2.0      | 1.0   | 0.4  | 1.0       | 0.4     | 0.4      | 2.0       | 1.0     | 1.0      |
| EERM       | –        | –     | –    | –         | –       | –        | –         | –       | –        |
| SRGNN      | 1e-5     | 1e-6  | 1e-4 | 1e-6      | 1e-6    | 1e-6     | 1e-6      | 1e-5    | 1e-6     |

Table 29: OOD hyperparameter selections on GOOD-Twitch.

| GOOD-Twitch | tune set                 |      |       | language  |         |          |
|-------------|--------------------------|------|-------|-----------|---------|----------|
|             |                          |      |       | covariate | concept | no shift |
| ERM         | —                        | —    | —     | —         | —       | —        |
| IRM         | 10.0                     | 0.1  | 1.0   | 10.0      | 1.0     | 0.1      |
| VREx        | 100.0                    | 10.0 | 1.0   | 100.0     | 100.0   | 10.0     |
| GroupDRO    | 0.001                    | 0.1  | 0.01  | 0.1       | 0.1     | 0.001    |
| DANN        | 0.1                      | 0.01 | 0.001 | 0.01      | 0.001   | 0.01     |
| Deep Coral  | 0.01                     | 1.0  | 0.1   | 0.01      | 0.01    | 0.1      |
| Mixup       | 2.0                      | 0.4  | 1.0   | 0.4       | 0.4     | 0.4      |
| EERM        | 1/3, 1e-2/5e-3/1e-2/1e-4 |      |       | 1,1e-2    | 3,5e-3  | 3,1e-2   |
| SRGNN       | 1e-5                     | 1e-6 | 1e-4  | 1e-5      | 1e-6    | 1e-6     |

Table 30: OOD hyperparameter selections on GOOD-WebKB.

| GOOD-WebKB | tune set                 |       |      | university |         |          |
|------------|--------------------------|-------|------|------------|---------|----------|
|            |                          |       |      | covariate  | concept | no shift |
| ERM        | —                        | —     | —    | —          | —       | —        |
| IRM        | 10.0                     | 1.0   | 0.1  | 10.0       | 10.0    | 10.0     |
| VREx       | 10.0                     | 100.0 | 1.0  | 10.0       | 10.0    | 1.0      |
| GroupDRO   | 0.01                     | 0.001 | 0.1  | 0.001      | 0.01    | 0.1      |
| DANN       | 0.001                    | 0.01  | 0.1  | 0.001      | 0.01    | 0.001    |
| Deep Coral | 0.1                      | 1.0   | 0.01 | 0.01       | 0.01    | 1.0      |
| Mixup      | 0.4                      | 1.0   | 2.0  | 2.0        | 0.4     | 2.0      |
| EERM       | 1/3, 1e-2/5e-3/1e-2/1e-4 |       |      | 3,1e-3     | 3,5e-3  | 3,1e-3   |
| SRGNN      | 1e-5                     | 1e-6  | 1e-4 | 1e-6       | 1e-5    | 1e-4     |

Table 31: OOD hyperparameter selections on GOOD-CBAS.

| GOOD-CBAS  | tune set                 |       |       | color     |         |          |
|------------|--------------------------|-------|-------|-----------|---------|----------|
|            |                          |       |       | covariate | concept | no shift |
| ERM        | —                        | —     | —     | —         | —       | —        |
| IRM        | 10.0                     | 1.0   | 0.1   | 10.0      | 1.0     | 10.0     |
| VREx       | 100.0                    | 1.0   | 10.0  | 100.0     | 100.0   | 1.0      |
| GroupDRO   | 0.1                      | 0.01  | 0.001 | 0.1       | 0.001   | 0.01     |
| DANN       | 0.01                     | 0.001 | 0.1   | 0.1       | 0.1     | 0.01     |
| Deep Coral | 0.01                     | 0.1   | 0.001 | 0.01      | 0.001   | 0.01     |
| Mixup      | 0.4                      | 1.0   | 2.0   | 0.4       | 2.0     | 0.4      |
| EERM       | 1/3, 1e-2/5e-3/1e-2/1e-4 |       |       | 1,5e-3    | 1,1e-2  | 1,1e-2   |
| SRGNN      | 1e-5                     | 1e-6  | 1e-4  | 1e-5      | 1e-5    | 1e-6     |

## F GOOD Usage Guidelines and Maintenance Schedule

We provide the open-source GOOD project to reproduce all reported results and extend OOD datasets and algorithms. The GOOD project enables automatic dataset downloads, easy data loading, and handy start-up code to work with any GOOD dataset or method. Meanwhile, we provide various modular utilities for OOD method development. Reproduction is available and effortless with given test scripts and automatic re-loading of our best checkpoints. Please refer to our GitHub repository for installation details, along with more documentation and usage information at <https://github.com/divelab/GOOD/>. The code of GOOD uses the GPL3.0 license, while the datasets follow the MIT license. Please refer to the GOOD GitHub repository for license details.

We provide simple and standardized examples for dataset loading and training/evaluation procedures.

## **F.1 GOOD dataset loading**

Code listing 1 shows two ways to import a GOOD dataset and specify the domain selection and shift split.

## **F.2 GOOD training/test pipeline**

Code listing 2 provides a script to use the main function of the training/evaluation pipeline, following the three steps of loading the config, specifying the model, and executing the task.

## **F.3 Maintenance schedule**

GOOD is maintained on GitHub, with CI tests hosted by CircleCI. We welcome public use of the community. Any issues or discussions regarding technical or other concerns can be submitted to the GitHub repository, and we will reply as soon as possible. GOOD benchmark is a growing project and expects to include more datasets, splits, and methods along with the development of the field. We expect to include more methods in future work, especially graph-related ones. We will also include datasets and domain selections of a larger quantity and variety. In addition, the current benchmark does not consider link prediction tasks [13], which will be added as the project develops.

GOOD provides simple APIs for loading OOD algorithms, graph neural networks, and datasets, taking only several lines of code to start. The full OOD split generalization code is provided for extensions and any new graph OOD dataset contributions. OOD algorithm base class can be easily overwritten to create new OOD methods. In addition to playing as a package, GOOD is also an integrated and well-organized project ready to be further developed. All algorithms, models, and datasets can be easily registered by the register and automatically embedded into the designed pipeline without much effort. The only thing the user needs to do is write their own OOD algorithm class, model class, or new dataset class. Then they can compare their results with the leaderboard. We provide insightful comparisons from multiple perspectives. Any research and studies can use our leaderboard results for comparison. Note that this is a growing project, so we will include new OOD algorithms gradually. Besides, we welcome researchers to include their algorithms in the leaderboard. We welcome and will assist with any contributions to this project. We expect GOOD as a graph OOD research, study, and development toolkit of easy use.

```

# Directly import
from GOOD.data.good_datasets.good_hiv import GOODHIV
hiv_datasets, hiv_meta_info = GOODHIV.load(
    dataset_root,
    domain='scaffold',
    shift='covariate',
    generate=False
)
# Or use register
from GOOD import register as good_reg
hiv_datasets, hiv_meta_info = good_reg.datasets['GOODHIV'].load(
    dataset_root,
    domain='scaffold',
    shift='covariate',
    generate=False
)
cmnist_datasets, cmnist_meta_info = ood_reg.datasets['GOODCMNIST'].load(
    dataset_root,
    domain='color',
    shift='concept',
    generate=False
)

```

Listing 1: **GOOD dataset loader**

```

# Load a config
from GOOD import config_summoner
from GOOD.utils.args import args_parser
from GOOD.utils.logger import load_logger
args = args_parser()
config = config_summoner(args)
load_logger(config)

# Load a GNN, a dataloader, and an OOD algorithm
from GOOD.kernel.pipeline import initialize_model_dataset
from GOOD.ood_algorithms.ood_manager import load_ood_alg
model, loader = initialize_model_dataset(config)
ood_algorithm = load_ood_alg(config.ood.ood_alg, config)

# Start training
from GOOD.kernel.train import train
train(model, loader, ood_algorithm, config)
# Or start a test
from GOOD.kernel.evaluation import evaluate
test_stat = evaluate(model, loader, ood_algorithm, 'test', config)

```

Listing 2: **GOOD taining/test pipeline**

## References

- [1] Aleksandar Bojchevski and Stephan Günnemann. Deep gaussian embedding of graphs: Unsupervised inductive learning via ranking. *arXiv preprint arXiv:1707.03815*, 2017.
- [2] Matthias Fey and Jan Eric Lenssen. Fast graph representation learning with PyTorch Geometric. *arXiv preprint arXiv:1903.02428*, 2019.
- [3] Justin Gilmer, Samuel S Schoenholz, Patrick F Riley, Oriol Vinyals, and George E Dahl. Neural message passing for quantum chemistry. In *International conference on machine learning*, pages 1263–1272. PMLR, 2017.
- [4] Rafael Gómez-Bombarelli, Jennifer N Wei, David Duvenaud, José Miguel Hernández-Lobato, Benjamín Sánchez-Lengeling, Dennis Sheberla, Jorge Aguilera-Iparraguirre, Timothy D Hirzel, Ryan P Adams, and Alán Aspuru-Guzik. Automatic chemical design using a data-driven continuous representation of molecules. *ACS central science*, 4(2):268–276, 2018.
- [5] Weihua Hu, Matthias Fey, Marinka Zitnik, Yuxiao Dong, Hongyu Ren, Bowen Liu, Michele Catasta, and Jure Leskovec. Open graph benchmark: Datasets for machine learning on graphs. *Advances in neural information processing systems*, 33:22118–22133, 2020.
- [6] Thomas N. Kipf and Max Welling. Semi-supervised classification with graph convolutional networks. In *International Conference on Learning Representations (ICLR)*, 2017.
- [7] Yiwei Wang, Wei Wang, Yuxuan Liang, Yujun Cai, and Bryan Hooi. Mixup for node and graph classification. In *Proceedings of the Web Conference 2021*, pages 3663–3674, 2021.
- [8] Zhenqin Wu, Bharath Ramsundar, Evan N Feinberg, Joseph Gomes, Caleb Geniesse, Aneesh S Pappu, Karl Leswing, and Vijay Pande. MoleculeNet: a benchmark for molecular machine learning. *Chemical science*, 9(2):513–530, 2018.
- [9] Keyulu Xu, Weihua Hu, Jure Leskovec, and Stefanie Jegelka. How powerful are graph neural networks? In *International Conference on Learning Representations*, 2019. URL <https://openreview.net/forum?id=ryGs6iA5Km>.
- [10] Hanqing Zeng, Hongkuan Zhou, Ajitesh Srivastava, Rajgopal Kannan, and Viktor Prasanna. GraphSAINT: Graph sampling based inductive learning method. In *International Conference on Learning Representations*, 2020. URL <https://openreview.net/forum?id=BJe8pkHFWs>.
- [11] Hongyi Zhang, Moustapha Cisse, Yann N Dauphin, and David Lopez-Paz. mixup: Beyond empirical risk minimization. *arXiv preprint arXiv:1710.09412*, 2017.
- [12] Xingxuan Zhang, Linjun Zhou, Renzhe Xu, Peng Cui, Zheyang Shen, and Haoxin Liu. NICO++: Towards better benchmarking for domain generalization. *arXiv preprint arXiv:2204.08040*, 2022.
- [13] Yangze Zhou, Gitta Kutyniok, and Bruno Ribeiro. OOD link prediction generalization capabilities of message-passing GNNs in larger test graphs. *arXiv preprint arXiv:2205.15117*, 2022.
